# Supplementary material for: Physiologically Based Pharmacokinetic (PBPK) Modeling of Interstrain Variability in Trichloroethylene Metabolism in the Mouse
Source: PubMed Central journal article supplement (PMC4014769; doi:10.1289/ehp.1307623), 2014-02-11
Supplement: ehp.1307623.s002.pdf [file ehp.1307623.s002.pdf]

**Supplemental Material – PBPK Model Code**

**Physiologically Based Pharmacokinetic (PBPK) Modeling  
of Interstrain Variability in Trichloroethylene  
Metabolism in the Mouse**

Weihsueh A. Chiu, Jerry L. Campbell Jr., Harvey J. Clewell 3<sup>rd</sup>, Yi-Hui Zhou, Fred A. Wright,  
Kathryn Z. Guyton, and Ivan Rusyn

```

# TCE.risk.2.0.gamma.IS.pop.model -- TCE risk assessment PBPK model for
#                               multistrain mouse data
#
# Model code for MCSim, modified from TCE.risk.1.2.3.3.pop.model
published in
#
# Chiu WA, Okino MS, Evans MV. Characterizing uncertainty and population
# variability in the toxicokinetics of trichloroethylene and metabolites
# in mice, rats, and humans using an updated database, physiologically
# based pharmacokinetic (PBPK) model, and Bayesian approach. Toxicol
# Appl Pharmacol. 2009 Nov 15;241(1):36-60. doi:
10.1016/j.taap.2009.07.032.
# Epub 2009 Aug 4.
#
# Evans MV, Chiu WA, Okino MS, Caldwell JC. Development of an updated
# PBPK model for trichloroethylene and metabolites in mice, and its
# application to discern the role of oxidative metabolism in TCE-induced
# hepatomegaly. Toxicol Appl Pharmacol. 2009 May 1;236(3):329-40.
# doi: 10.1016/j.taap.2009.02.013. Epub 2009 Feb 26.
#
# Modifications are labeled with a comment "#(v2.0)"
#
#*****
#***                               State Variable Specifications
#***
#*****

States = {
##-- TCE uptake
    AStom,          # Amount of TCE in stomach
    ADuod,          # oral gavage absorption -- mice and rats only
#(v1e)    AExc,     # excreted in feces from gavage -- mice and rats
only
#(v1e)    AO,       # total absorbed
    InhDose,       # Amount inhaled
##-- TCE in the body
    ARap,          # Amount in rapidly perfused tissues
    ASlw,          # Amount in slowly perfused tissues
    AFat,          # Amount in fat
    AGut,          # Amount in gut
    ALiv,          # Amount in liver
#(v1j)    ATB,      # Amount in TB -- candidate to remove and put in
Rap
# comment out for #(v1b)(v1c)
#(v1.2)    RTB,    #(v1j) Rate of metabolism in TB
    AKid,          # Amount in Kidney -- previously in Rap tissue
    ABld,          # Amount in Blood -- previously in Rap tissue
# comment out for #(v1a)(v1c)
    AInhResp,     #(v1.2) Amount in respiratory lumen during inhalation
    AResp,        #(v1.2) Amount in respiratory tissue
    AExhResp,     #(v1.2) Amount in respiratory lumen during exhalation
##-- DCA in body

```

```

        ADCA,          # Amount in central compartment#(v2.0)
        ADCAPER, # Amount in peripheral compartment#(v2.0)
#(vle)  AELIMDCA, # Amount eliminated#(v2.0)
#
##-- TCA in the body
#(vle)  AOTCA,
        ASTOMTCA, # Amount of TCA in stomach
        APLASTCA, # Amount of TCA in plasma #comment out for #(vlh)
        ABODTCA, # Amount of TCA in lumped body compartment
        ALIVTCA, # Amount of TCA in liver
##-- TCA metabolized
        AUURNTCA, # Cumulative Amount of TCA excreted in urine
        AUURNTCA_sat, # Amount of TCA excreted that during times that
had
        # saturated measurements (for lower bounds)
        AUURNTCA_collect, # Cumulative Amount of TCA excreted in urine during
        # collection times (for intermittent collection)
##-- TCOH in body
#(vle)  AOTCOH,
        ASTOMTCOH, # Amount of TCOH in stomach
        ABODTCOH, # Amount of TCOH in lumped body compartment
        ALIVTCOH, # Amount of TCOH in liver
##-- TCOG in body
        ABODTCOG, # Amount of TCOG in lumped body compartment
        ALIVTCOG, # Amount of TCOG in liver
        ABILETCOG, # Amount of TCOG in bile (incl. gut)
#(vle)  ARECIRCTCOG,
##-- TCOG excreted
        AUURNTCOG, # Amount of TCOG excreted in urine
        AUURNTCOG_sat, # Amount of TCOG excreted that during times that
had
        # saturated measurements (for lower bounds)
        AUURNTCOG_collect, # Cumulative Amount of TCA excreted in urine
during
        # collection times (for intermittent collection)
##-- DCVG in body
#(vle)  ADCVGIN,
        ADCVGMOL, # Amount of DCVG in body in mmoles
#(vle)  AMETDCVG,
##-- DCVC in body
#(vle)  ADCVCIN,
        ADCVC, # Amount of DCVC in body
#(v2.0) deleted ABIOACTDCVC,
##-- DCVC eliminated#(v2.0)
#(vle)  AELIMDCVC, # Amount of DCVC eliminated#(v2.0)
##-- Other states for TCE
        ACH, # Amount in closed chamber -- mice and rats only
        AEXH, # Amount exhaled
        AEXHEXP, # Amount exhaled during expos [to calc. retention]
##-- Metabolism
        AMETLIV1, # Amount metabolized by P450 in liver#(vrisk)
        AMETLIV2, # Amount metabolized by GSH conjugation in liver#(vrisk)
        AMETLNG, # Amount metabolized in the lung#(vrisk)
        AMETKID, # (vrisk)

```

```

    AMetTCOHTCA,      # Amount of TCOH metabolized to TCA#(vrisk)
#(vle)    AMetTCOHGluc,      # Amount of TCOH glucuronidated
#(vle)    AMetTCOHOther,
#(vle)    AMetTCA,      # Amount of TCA metabolized
##-- Other Dose metrics
#(vld)    AUCCBld,      #
#(vld)    AUCCLiv,      #
#(vld)    AUCCKid,      #
#(vld)    AUCCFat,      ##
#(vld)    AUCCRap,      ##
#(vld)    AUCCSlw,      ##
#(vld)    AUCCGut,      ##
#(vld)    AUCCChl,      #
#(vld)    AUCCTCOH,      #
#(vld)    AUCCTCOG,      #
#(vld)    AUCPlasTCAFree,#
#(vld)    AUCPlasTCA      #
};

*****
*****
***          Input Variable Specifications
***
*****
*****

Inputs = {
##-- TCE dosing
    Conc,      # Inhalation exposure conc. (ppm)
    IVDose,      # IV dose (mg/kg)
    PDose,      # Oral gavage dose (mg/kg)
    Drink,      # Drinking water dose (mg/kg/day)
    IADose,      # Inter-arterial (vlf)
    PVDose,      # Portal Vein (vlf)
##-- TCA dosing
    IVDoseTCA, # IV dose (mg/kg) of TCA
    PODoseTCA, # Oral dose (mg/kg) of TCA
##-- TCOH dosing
    IVDoseTCOH, # IV dose (mg/kg) of TCOH
    PODoseTCOH, # Oral dose (mg/kg) of TCOH
##-- Potentially time-varying parameters
    QPmeas,      # Measured value of Alveolar ventilation QP
    TCAUrnSat,  # Flag for saturated TCA urine
    TCOGUrnSat, # Flag for saturated TCOG urine
    UrnMissing # Flag for missing urine collection times
};

*****
*****
***          Output Variable Specifications
***
*****
*****

Outputs = {

```

```

*****
#*** Outputs for mass balance check
MassBaltTCE,
MassBaltCOH,
MassBalDCA, # (v2.0)
MassBaltTCA,
MassBaltCOG,
MassBalDCVG,
MassBalDCVC,

*****
#*** Outputs for comparison to in vivo data
# TCE
#(v1.2) AlvRet, # human - Fractional alveolar retention = (CInh-
CAlv)/CInh
#(v1.2)          # = 1 - AExhExp/InhDose
RetDose, # human - = (InhDose - AExhExp)
CAlv, # needed for CAlvPPM
CAlvPPM, # human
CInhPPM, # mouse, rat
CInh, # needed for CMixExh
CMixExh, # rat - Mixed exhaled breath (mg/l)
CArt, # rat, human - Arterial blood concentration
CVen, # mouse, rat, human
CBldMix, # rat - Concentration in mixed arterial+venous blood
          # (used for cardiac puncture)
CFat, # mouse, rat - Concentration in fat
CGut, # rat
CRap, # needed for unlumped tissues
CSlw, # needed for unlumped tissues
#(v1.2) CTB, # needed for lung
CHrt, # rat - Concentration in heart tissue [use CRap]
CKid, # mouse, rat - Concentration in kidney
CLiv, # mouse, rat - Concentration in liver
CLung, # mouse, rat - Concentration in lung [use CRap]
CMus, # rat - Concentration in muscle [use CSLw]
CSpl, # rat - Concentration in spleen [use CRap]
CBrn, # rat - Concentration in brain [use CRap]
zAExh, # mouse
zAExhpost, # rat - Amount exhaled post-exposure (mg)

# TCOH
TCOH, # mouse, rat, human - TCOH concentration in blood
CKidTCOH, # mouse - TCOH concentration in kidney
CLivTCOH, # mouse - TCOH concentration in liver
CLungTCOH, # mouse - TCOH concentration in lung

# TCA
CPlasTCA, # mouse, rat, human - TCA concentration in plasma
CBldTCA, # mouse, rat, human - TCA concentration in blood
CBodTCA, # needed for CKidTCA and CLungTCA
CKidTCA, # mouse - TCA concentration in kidney

```

```

CLivTCA,      # mouse, rat - TCA concentration in liver
CLungTCA,     # mouse - TCA concentration in lung
zAUrnTCA,     # mouse, rat, human - Cumulative Urinary TCA
zAUrnTCA_collect, # human - TCA measurements for intermittent collection
zAUrnTCA_sat,  # human - Saturated TCA measurements

# TCOG
zABileTCOG, # rat - Amount of TCOG in bile (mg)
CTCOG,      # needed for CTCOGTCOH
CTCOGTCOH, # mouse - TCOG concentration in blood (in TCOH-equiv)
CKidTCOGTCOH, # mouse - TCOG concentration in kidney (in TCOH-equiv)
CLivTCOGTCOH, # mouse - TCOG concentration in liver (in TCOH-equiv)
CLungTCOGTCOH, # mouse - TCOG concentration in lung (in TCOH-equiv)
AUrnTCOGTCOH, # mouse, rat, human - Cumulative Urinary TCOG (in TCOH-equiv)
AUrnTCOGTCOH_collect, # human - TCOG (in TCOH-equiv) measurements for
# intermittent collection
AUrnTCOGTCOH_sat, # human - Saturated TCOG (in TCOH-equiv) measurements

# Other
CDCVGmol,      # concentration of DCVG (mmol/l)
CDCVGmol0,    # Dummy variable without likelihood (for plotting)
CDCVG_ND,     # Non-detect of DCVG (<0.001 nmol/ml= 1e-6 mmol/l )#(v2.0)
# Output -ln(likelihood)
CDCVCmol,      # concentration of DCVC (mmol/l) #(v2.0)
CDCVCmol0,    # Dummy variable without likelihood (for plotting)#(v2.0)
CDCVC_ND,     # Non-detect of DCVC (<0.001 nmol/ml= 1e-6 mmol/l )#(v2.0)
# Output -ln(likelihood)#(v2.0)
CDCAmol,      # concentration of DCA (mmol/l) #(v2.0)
CDCAmol0,    # Dummy variable without likelihood (for plotting)#(v2.0)
CDCA_ND,     # Non-detect of DCA (<0.01 nmol/ml= 1e-5 mmol/l )#(v2.0)
# Output -ln(likelihood)#(v2.0)
AUrnTCTotMole, # rat, human - Cumulative urinary TCOH+TCA in mmoles
TotCTCOH,     # mouse, human - TCOH+TCOG Concentration (in TCOH-equiv)
TotCTCOHcomp, # ONLY FOR COMPARISON WITH HACK
ATCOG,       # ONLY FOR COMPARISON WITH HACK
QPsamp,      # human - sampled value of alveolar ventilation rate

      AMetOX,      # Amount of TCE oxidized #(vrisk)
      AMetGSH,     # Amount of TCE conjugated #(vrisk)
      TotTCAProd, # Amount TCA produced in mg TCA #(vrisk)
      TotDCAProd, # Amount DCA produced in mg DCA #(vrisk)

## PARAMETERS #(vrisk3)
QCnow, # (vrisk3) #Cardiac output (L/hr)
QP, # (vrisk3) #Alveolar ventilation (L/hr)
QFatSC, # (vrisk3) #Scaled fat blood flow
QGutSC, # (vrisk3) #Scaled gut blood flow
QLivSC, # (vrisk3) #Scaled liver blood flow
QSlwSC, # (vrisk3) #Scaled slowly perfused blood flow
QRapSC, # (vrisk3) #Scaled rapidly perfused blood flow
QKidSC, # (vrisk3) #Scaled kidney blood flow
DResp, # (vrisk3) #Respiratory lumen:tissue diffusive clearance rate

```

VFatSC, # (vrisk3) #Fat fractional compartment volume  
 VGutSC, # (vrisk3) #Gut fractional compartment volume  
 VLivSC, # (vrisk3) #Liver fractional compartment volume  
 VRapSC, # (vrisk3) #Rapidly perfused fractional compartment volume  
 VRespLumSC, # (vrisk3) # Fractional volume of respiratory lumen  
 VRespEffSC, # (vrisk3) #Effective fractional volume of respiratory  
 tissue  
 VKidSC, # (vrisk3) #Kidney fractional compartment volume  
 VBldSC, # (vrisk3) #Blood fractional compartment volume  
 VSlwSC, # (vrisk3) #Slowly perfused fractional compartment volume  
 VPlasSC, # (vrisk3) #Plasma fractional compartment volume  
 VBodSC, # (vrisk3) #TCA Body fractional compartment volume [not incl.  
 blood+liver]  
 VBodTCOHSC, # (vrisk3) #TCOH/G Body fractional compartment volume [not  
 incl. liver]  
 PB, # (vrisk3) #TCE Blood/air partition coefficient  
 PFat, # (vrisk3) #TCE Fat/Blood partition coefficient  
 PGut, # (vrisk3) #TCE Gut/Blood partition coefficient  
 PLiv, # (vrisk3) #TCE Liver/Blood partition coefficient  
 PRap, # (vrisk3) #TCE Rapidly perfused/Blood partition coefficient  
 PResp, # (vrisk3) #TCE Respiratory tissue:air partition coefficient  
 PKid, # (vrisk3) #TCE Kidney/Blood partition coefficient  
 PSlw, # (vrisk3) #TCE Slowly perfused/Blood partition coefficient  
 TCAPlas, # (vrisk3) #TCA blood/plasma concentration ratio  
 PBodTCA, # (vrisk3) #Free TCA Body/blood plasma partition coefficient  
 PLivTCA, # (vrisk3) #Free TCA Liver/blood plasma partition coefficient  
 kDissoc, # (vrisk3) #Protein/TCA dissociation constant (umole/L)  
 BMax, # (vrisk3) #Maximum binding concentration (umole/L)  
 PBodTCOH, # (vrisk3) #TCOH body/blood partition coefficient  
 PLivTCOH, # (vrisk3) #TCOH liver/body partition coefficient  
 PBodTCOG, # (vrisk3) #TCOG body/blood partition coefficient  
 PLivTCOG, # (vrisk3) #TCOG liver/body partition coefficient  
 VDCVG, # (vrisk3) #DCVG effective volume of distribution  
 VDCVC, # (v2.0risk)  
 VDCA, # (v2.0risk)  
 kAS, # (vrisk3) #TCE Stomach absorption coefficient (/hr)  
 kTSD, # (vrisk3) #TCE Stomach-duodenum transfer coefficient (/hr)  
 kAD, # (vrisk3) #TCE Duodenum absorption coefficient (/hr)  
 kTD, # (vrisk3) #TCE Duodenum-feces transfer coefficient (/hr)  
 kASTCA, # (vrisk3) #TCA Stomach absorption coefficient (/hr)  
 kASTCOH, # (vrisk3) #TCOH Stomach absorption coefficient (/hr)  
 VMax, # (vrisk3) #VMax for hepatic TCE oxidation (mg/hr)  
 KM, # (vrisk3) #KM for hepatic TCE oxidation (mg/L)  
 FracOther, # (vrisk3) #Fraction of hepatic TCE oxidation not to  
 TCA+TCOH  
 FracTCA, # (vrisk3) #Fraction of hepatic TCE oxidation to TCA  
 VMaxDCVG, # (vrisk3) #VMax for hepatic TCE GSH conjugation (mg/hr)  
 KMDCVG, # (vrisk3) #KM for hepatic TCE GSH conjugation (mg/L)  
 ClDCVG, # (vrisk3) #CL for hepatic TCE GSH conjugation (L/hr)  
 VMaxKidDCVG, # (vrisk3) #VMax for renal TCE GSH conjugation (mg/hr)  
 KMKidDCVG, # (vrisk3) #KM for renal TCE GSH conjugation (mg/L)  
 FracKidDCVC, # (vrisk3) #Fraction of renal TCE GSH conj. "directly" to  
 DCVC  
 # (vrisk3) #(i.e., via first pass)

```

VMaxClara, # (vrisk3) #VMax for Tracheo-bronchial TCE oxidation (mg/hr)
KMClara, # (vrisk3) #KM for Tracheo-bronchial TCE oxidation (mg/L)
FracLungSys, # (vrisk3) #Fraction of respiratory metabolism to systemic
circ.
kClearDCA, # Rate constant for DCA elimination (/hr)#(v2.0risk)
kDCAcen_per, # Rate constant for DCA central->peripheral
(/hr)#(v2.0risk)
kDCAper_cen, # Rate constant for DCA peripheral->central
(/hr)#(v2.0risk)
VMaxTCOH, # (vrisk3) #VMax for hepatic TCOH->TCA (mg/hr)
KMTCOH, # (vrisk3) #KM for hepatic TCOH->TCA (mg/L)
VMaxGluc, # (vrisk3) #VMax for hepatic TCOH->TCOG (mg/hr)
KMGluc, # (vrisk3) #KM for hepatic TCOH->TCOG (mg/L)
kMetTCOH, # (vrisk3) #Rate constant for hepatic TCOH->other (/hr)
kUrnTCA, # (vrisk3) #Rate constant for TCA plasma->urine (/hr)
kMetTCA, # (vrisk3) #Rate constant for hepatic TCA->other (/hr)
kBile, # (vrisk3) #Rate constant for TCOG liver->bile (/hr)
kEHR, # (vrisk3) #Lumped rate constant for TCOG bile->TCOH liver (/hr)
kUrnTCOG, # (vrisk3) #Rate constant for TCOG->urine (/hr)
kDCVG, # (vrisk3) #Rate constant for hepatic DCVG->DCVC (/hr)
kElimDCVC, # Lumped rate constant for DCVC elimination
(/hr)#(v2.0risk)

## Misc
RAO,
CVenMole,
CPlasTCAMole,
CPlasTCAFreeMole #(v1d), #

*****
****
*** Outputs that are dose metrics
#(v1d) AMetLiv1BW, # Amount of oxidative metabolism in liver/liver
volume
#(v1d) RiskKid # Amount of DCVC bioactivated/kidney volume

};

*****
****
*** Global Constants
***
*****

# Molecular Weights
MWTCE = 131.39; # TCE
MWDCA = 129.0; # DCA
MWDCVC = 216.1; # DCVC
MWTCA = 163.5; # TCA
MWChlor = 147.5; # Chloral
MWTCOH = 149.5; # TCOH
MWTCOHgluc = 325.53; # TCOH-Gluc
MWNADCVC = 258.8; # N Acetyl DCVC

```

```

# Stoichiometry
StochChlorTCE = MWChlor / MWTCE;
  StochDCATCE = MWDCA / MWTCE;
  StochTCATCE = MWTCA / MWTCE;
  StochTCATCOH = MWTCA / MWTCOH;
  StochTCOHTCE = MWTCOH / MWTCE;
StochGlucTCOH = MWTCOHGluc / MWTCOH;
StochTCOHGluc = MWTCOH / MWTCOHGluc;
  StochTCEGluc = MWTCE / MWTCOHGluc;
  StochDCVCTCE = MWDCVC / MWTCE;
  StochN = MWNADCVC / MWDCVC;

#*****
#*****
#***          Global Model Parameters
#***
#*****
#*****
# These are the actual model parameters used in "dynamics."
# Values that are assigned in the "initialize" section,
# are all set to 1 to avoid confusion.

#*****
#*****
# Flows
QC      = 1; # Cardiac output (L/hr)
QPsamp  = 1; # Alveolar ventilation (L/hr)
VPR     = 1; # Alveolar ventilation-perfusion ratio
QFatCtmp = 1; # Scaled fat blood flow
QGutCtmp = 1; # Scaled gut blood flow
QLivCtmp = 1; # Scaled liver blood flow
QSlwCtmp = 1; # Scaled slowly perfused blood flow
#(v1.2) QTBCtmp = 1; # Scaled tracheo-bronchial blood flow
DResptmp = 1; #(v1.2) Respiratory lumen:tissue diffusive clearance
rate (L/hr) [scaled to QP]
QKidCtmp = 1; # Scaled kidney blood flow
FracPlas = 1; # Fraction of blood that is plasma (1-hematocrit)
#*****
#*****
# Volumes
VFat = 1; # Fat compartment volume (L)
VGut = 1; # Gut compartment volume (L)
VLiv = 1; # Liver compartment volume (L)
VRap = 1; # Rapidly perfused compartment volume (L)
#(v1.2) VTB = 1; # Tracheo-bronchial compartment volume (L)
VRespLum = 1; #(v1.2) Volume of respiratory lumen (L air)
VRespEff = 1; #(v1.2) Effective volume for respiratory tissue (L air)
= V(tissue) * Resp:Air partition coefficient
VKid = 1; # Kidney compartment volume (L)
VBld = 1; # Blood compartment volume (L)
VSlw = 1; # Slowly perfused compartment volume (L)
VPlas = 1; # Plasma compartment volume [fraction of blood] (L)
VBod = 1; # TCA Body compartment volume [not incl. blood+liver] (L)

```

```

VBodTCOH    = 1; # TCOH/G Body compartment volume [not incl. liver] (L)
#*****
*****
# Distribution/partitioning
PB          = 1; # TCE Blood/air partition coefficient
PFat       = 1; # TCE Fat/Blood partition coefficient
PGut       = 1; # TCE Gut/Blood partition coefficient
PLiv       = 1; # TCE Liver/Blood partition coefficient
PRap       = 1; # TCE Rapidly perfused/Blood partition coefficient
#(v1.2) PTB = 1; # TCE Tracheo-bronchial/Blood partition coefficient
PResp      = 1; #(v1.2) TCE Respiratory tissue:air partition coefficient
PKid       = 1; # TCE Kidney/Blood partition coefficient
PSlw       = 1; # TCE Slowly perfused/Blood partition coefficient
TCAPlas    = 1; # TCA blood/plasma concentration ratio
PBodTCA    = 1; # Free TCA Body/blood plasma partition coefficient
PLivTCA    = 1; # Free TCA Liver/blood plasma partition coefficient
kDissoc    = 1; # Protein/TCA dissociation constant (umole/L)
BMax       = 1; # Protein concentration (UNITS?)
PBodTCOH   = 1; # TCOH body/blood partition coefficient
PLivTCOH   = 1; # TCOH liver/body partition coefficient
PBodTCOG   = 1; # TCOG body/blood partition coefficient
PLivTCOG   = 1; # TCOG liver/body partition coefficient
VDCVG      = 1; # DCVG effective volume of distribution
VDCVC      = 1; # DCVC effective volume of distribution#(v2.0)
VDCA       = 1; # DCA effective volume of distribution (central
compartment)#(v2.0)
#*****
*****
# Oral absorption
kTSD       = 1.4; # TCE Stomach-duodenum transfer coefficient (/hr)
kAS        = 1.4; # TCE Stomach absorption coefficient (/hr)
kTD        = 0.1; # TCE Duodenum-feces transfer coefficient (/hr)
kAD        = 0.75; # TCE Duodenum absorption coefficient (/hr)
kASTCA     = 0.75; # TCA Stomach absorption coefficient (/hr)
kASTCOH    = 0.75; # TCOH Stomach absorption coefficient (/hr)
#*****
*****
# TCA and DCA background
TCABgd     = 0; # mg/kg/d
DCABgd     = 0; # mg/kg/d
#*****
*****
# TCE Metabolism
VMax       = 1; # VMax for hepatic TCE oxidation (mg/hr)
KM         = 1; # KM for hepatic TCE oxidation (mg/L)
FracOther  = 1; # Fraction of hepatic TCE oxidation not to TCA+TCOH
FracTCA    = 1; # Fraction of hepatic TCE oxidation to TCA
VMaxDCVG  = 1; # VMax for hepatic TCE GSH conjugation (mg/hr)
KMDCVG     = 1; # KM for hepatic TCE GSH conjugation (mg/L)
VMaxKidDCVG = 1; # VMax for renal TCE GSH conjugation (mg/hr)
KMKidDCVG  = 1; # KM for renal TCE GSH conjugation (mg/L)
VMaxClara  = 1; # VMax for Tracheo-bronchial TCE oxidation (mg/hr)
KMClara    = 1; # KM for Tracheo-bronchial TCE oxidation (mg/L)
#(v1.2) but in units of air concentration

```

```

#(v1.2) VMaxClear= 1; # VMax for Tracheo-bronchial CH clearance (mg/hr)
#(v1.2) KMClear = 1; # KM for Tracheo-bronchial CH clearance (mg/L)
FracLungSys= 1; #(v1.2) Fraction of respiratory oxidative metabolism
that enters systemic circulation

#*****
*****
# DCA metabolism/clearance#(v2.0)
kClearDCA = 1; # Rate constant for DCA elimination (/hr)#(v2.0)
kDCAcen_per= 1; # Rate constant for DCA central->peripheral (/hr)#(v2.0)
kDCAPER_cen= 1; # Rate constant for DCA peripheral->central (/hr)#(v2.0)
#*****
*****
# TCOH metabolism
VMaxTCOH = 1; # VMax for hepatic TCOH->TCA (mg/hr)
KMTCOH = 1; # KM for hepatic TCOH->TCA (mg/L)
VMaxGluc = 1; # VMax for hepatic TCOH->TCOG (mg/hr)
KMGluc = 1; # KM for hepatic TCOH->TCOG (mg/L)
kMetTCOH = 1; # Rate constant for hepatic TCOH->other (/hr)
#*****
*****
# TCA metabolism/clearance
kUrnTCA = 1; # Rate constant for TCA plasma->urine (/hr)
kMetTCA = 1; # Rate constant for hepatic TCA->other (/hr)
#*****
*****
# TCOG metabolism/clearance
kBile = 1; # Rate constant for TCOG liver->bile (/hr)
kEHR = 1; # Lumped rate constant for TCOG bile->TCOH liver (/hr)
kUrnTCOG = 1; # Rate constant for TCOG->urine (/hr)
#*****
*****
# DCVG metabolism
kDCVG = 1; # Rate constant for hepatic DCVG->DCVC (/hr)
FracKidDCVC = 1; # Fraction of renal TCE GSH conj. "directly" to DCVC
(i.e., via first pass)
#*****
*****
# DCVC metabolism/clearance
kElimDCVC = 1; # Lumped rate constant for DCVC elimination (/hr)#(v2.0)
#*****
*****
# Closed chamber and other exposure parameters
Rodents = 1; # Number of rodents in closed chamber data
VCh = 1; # Chamber volume for closed chamber data
kLoss = 1; # Rate constant for closed chamber air loss
CC = 0.0; # Initial chamber concentration (ppm)
TChng = 0.003; # IV infusion duration (hour)
#*****
*****
## Flag for species, sex -- these are global parameters
BW = 0.0; # Species-specific defaults during initialization
Male = 1.0; # 1 = male, 0 = female
Species = 1.0; # 1 = human, 2 = rat, 3 = mouse

```

```

*****
*****
***          Potentially measured covariates (constants)
***
*****
*****
BWmeas      = 0.0;      # Body weight
VfatCmeas   = 0.0; # Fractional volume fat
PBmeas      = 0.0;      # Measured blood-air partition coefficient
Hematocritmeas = 0.0; # Measured hematocrit -- used for FracPlas = 1 -
Hct
CDCVGmolLD  = 1e-6; # Detection limit of CDCVGmol (in mmol/L)#(v2.0)
CDCVCmolLD  = 1e-6; # Detection limit of CDCVCmol (in mmol/L)#(v2.0)
CDCAmolLD   = 1e-5; # Detection limit of CDCAmol (in mmol/L)#(v2.0)

*****
*****
***          Global Sampling Parameters
***
*****
*****
# These parameters are potentially sampled/calibrated in the MCMC or MC
# analyses. The default values here are used if no sampled value is
# given.
# M_ indicates population mean parameters used only in MC sampling
# V_ indicates a population variance parameter used in MC and MCMC
# sampling

# Flow Rates
lnQCC = 0.0;      # Scaled by BW^0.75 and species-specific central
estimates
lnVPRC      = 0.0;      # Scaled to species-specific central estimates

# Fractional Blood Flows to Tissues (fraction of cardiac output)
QFatC = 1.0;      # Scaled to species-specific central estimates
QGutC = 1.0;      # Scaled to species-specific central estimates
QLivC = 1.0;      # Scaled to species-specific central estimates
QSlwC = 1.0;      # Scaled to species-specific central estimates
#(v1.2) QTBC      = 1.0;      # Scaled to species-specific central
estimates
QKidC = 1.0;      # Scaled to species-specific central estimates
FracPlasC = 1.0;      # Scaled to species-specific central estimates
lnDRespC   = 0.0;      #(v1.2) Scaled to alveolar ventilation rate in
dynamics

# Fractional Tissue Volumes (fraction of BW)
VfatC = 1.0;      # Scaled to species-specific central estimates
VGutC = 1.0;      # Scaled to species-specific central estimates
VLivC = 1.0;      # Scaled to species-specific central estimates
VRapC = 1.0;      # Scaled to species-specific central estimates
#(v1.2) VTBC      = 1.0;      # Scaled to species-specific central
estimates

```

```

VRespLumC = 1.0;      # (v1.2) Scaled to species-specific central
estimates
VRespEffC = 1.0;      # (v1.2) Scaled to species-specific central
estimates

VKidC = 1.0;      # Scaled to species-specific central estimates
VBldC = 1.0;      # Scaled to species-specific central estimate

# Partition Coefficients for TCE
lnPBC = 0.0;      # Scaled to species-specific central estimates
lnPFatC = 0.0;    # Scaled to species-specific central estimates
lnPGutC = 0.0;    # Scaled to species-specific central estimates
lnPLivC = 0.0;    # Scaled to species-specific central estimates
lnPRapC = 0.0;    # Scaled to species-specific central estimates
# (v1.2) lnPTBC = 0.0;    # Scaled to species-specific central
estimates
lnPRespC = 0.0;   # (v1.2) Scaled to species-specific central
estimates
lnPKidC = 0.0;    # Scaled to species-specific central estimates
lnPSlwC = 0.0;    # Scaled to species-specific central estimates

# Partition Coefficients for TCA
lnPRBCPlasTCAC = 0.0;    # Scaled to species-specific central
estimates
lnPBodTCAC = 0.0;    # Scaled to species-specific central estimates
lnPLivTCAC = 0.0;    # Scaled to species-specific central estimates

# Plasma Binding for TCA
lnkDissocC = 0.0;    # Scaled to species-specific central estimates
lnBMaxkDC = 0.0;    # Scaled to species-specific central estimates

# Partition Coefficients for TCOH and TCOG
lnPBodTCOHC = 0.0;    # Scaled to species-specific central estimates
lnPLivTCOHC = 0.0;    # Scaled to species-specific central estimates
lnPBodTCOGC = 0.0;    # Scaled to species-specific central estimates
lnPLivTCOGC = 0.0;    # Scaled to species-specific central estimates
lnPeffDCVG = 0.0;    # Scaled to species-specific central estimates
lnPeffDCVC = 0.0;    # Scaled to species-specific central
estimates# (v2.0)
lnPeffDCA = 0.0;    # Scaled to species-specific central
estimates# (v2.0)

# Oral Absorption rates
lnkTSD = 0.336;
lnkAS = 0.336;
lnkTD = -2.303;
lnkAD = -0.288;
lnkASTCA = -0.288;
lnkASTCOH = -0.288;

# Background rates
lnTCABgd = -30;
lnDCABgd = -30;

```

```

# TCE Metabolism
lnVMaxC      = 0.0;      # Scaled by liver weight and species-specific
central estimates
lnKMC = 0.0;      # Scaled to species-specific central estimates
lnClC = 0.0;      # Scaled to species-specific central estimates
lnFracOtherC  = 0.0;      # Ratio of DCA to non-DCA
lnFracTCAC   = 0.0;      # Ratio of TCA to TCOH
lnVMaxDCVGC = 0.0;      # Scaled by liver weight and species-specific
central estimates
lnClDCVGC   = 0.0;      # Scaled to species-specific central estimates
lnKMDCVGC   = 0.0;      # Scaled to species-specific central estimates
lnVMaxKidDCVGC = 0.0;      # Scaled by kidney weight and species-
specific central estimates
lnClKidDCVGC = 0.0;      # Scaled to species-specific central
estimates
lnKMKidDCVGC = 0.0;      # Scaled to species-specific central
estimates
#(v1.2) lnClClaraC   = 0.0;      # Scaled by BW^0.75
lnVMaxLungLivC   = 0.0;      #(v1.2) Ratio of lung Vmax to liver Vmax,
# Scaled to species-specific central estimates
lnKMClara   = 0.0;      #(v1.2) now in units of air concentration

# Inter-strain scaling - relative to B6C3F1
lnISox = 0.0; # P450 oxidative metabolism
lnISTCA = 0.0; # fraction to TCA
lnISDCA = 0.0; # fraction to DCA
lnISConj = 0.0; # GSH conjugation metabolism
lnISkTCA = 0.0; # TCA metabolism/clearance
lnISkDCA = 0.0; # DCA metabolism/clearance
lnISkDCVG = 0.0; # DCVG -> DCVC
lnISkDCVC = 0.0; # DCVC clearance

# Clearance in lung
#(v1.2) lnVMaxClearC   = 0.0;      # Scaled by BW^0.75
#(v1.2) lnKMClearC   = 0.0;      #
lnFracLungSysC   = 0.0;      #(v1.2) ratio of systemic to local clearance
of lung oxidation

# TCOH Metabolism
lnVMaxTCOHC = 0.0;      # Scaled by BW^0.75
lnClTCOHC   = 0.0;      # Scaled by BW^0.75
lnKMTCOH    = 0.0;      #
lnVMaxGlucC = 0.0;      # Scaled by BW^0.75
lnClGlucC   = 0.0;      # Scaled by BW^0.75
lnKMGluc    = 0.0;      #
lnkMetTCOHC = 0.0;      # Scaled by BW^-0.25

# DCA metabolism/clearance#(v2.0)
lnkClearDCAC   = 0;      # Scaled by BW^-0.25#(v2.0)
lnkDCAcen_perC = 0;      # Scaled by BW^-0.25#(v2.0)
lnkDCAper_cenC = 0;      # Scaled by BW^-0.25#(v2.0)

# TCA Metabolism/clearance

```

```

lnkUrnTCAC = 0.0;      # Scaled by (plasma volume)^-1 and species-
specific central estimates
lnkMetTCAC = 0.0;      # Scaled by BW^-0.25

# TCOG excretion and reabsorption
lnkBileC    = 0.0;      # Scaled by BW^-0.25
lnkEHRC     = 0.0;      # Scaled by BW^-0.25
lnkUrnTCOGC = 0.0;      # Scaled by (blood volume)^-1 and species-specific
central estimates

# DCVG metabolism
lnFracKidDCVCC = 0.0;      # Ratio of "directly" to DCVC to systemic
DCVG
lnkDCVGC     = 0.0;      # Scaled by BW^-0.25

# DCVC metabolism
lnkElimDCVCC = 0.0;      # Scaled by BW^-0.25#(v2.0)

# Closed chamber parameters
NRodents     = 1; #
VChC         = 1; #
lnkLossC     = 0; #

*****
*****
# Population means
#
# These are given truncated normal or uniform distributions, depending on
# what prior information is available. Note that these distributions
# reflect uncertainty in the population mean, not inter-individual
# variability. Normal distributions are truncated at 2, 3, or 4 SD.
# For fractional volumes and flows, 2xSD
# For plasma fraction, 3xSD
# For cardiac output and ventilation-perfusion ratio, 4xSD
# For all others, 3xSD
# For uniform distributions, range of 1e2 to 1e8 fold, centered on
# central estimate.
#
M_lnQCC      = 1.0;
M_lnVPRC     = 1.0;
M_QFatC      = 1.0;
M_QGutC      = 1.0;
M_QLivC      = 1.0;
M_QSlwC      = 1.0;
#(v1.2) M_QTBC = 1.0;
M_QKidC      = 1.0;
M_FracPlasC  = 1.0;
M_lnDRespC   = 1.0; # (v1.2)
M_VFatC      = 1.0;
M_VGutC      = 1.0;
M_VLivC      = 1.0;
M_VRapC      = 1.0;
#(v1.2) M_VTBC = 1.0;
M_VRespLumC = 1.0; # (v1.2)

```

```

M_VRespEffC = 1.0; #(v1.2)
M_VKidC      = 1.0;
M_VBldC      = 1.0;
M_lnPBC      = 1.0;
M_lnPFatC    = 1.0;
M_lnPGutC    = 1.0;
M_lnPLivC    = 1.0;
M_lnPRapC    = 1.0;
#(v1.2) M_lnPTBC = 1.0;
M_lnPRespC   = 1.0; #(v1.2)
M_lnPKidC    = 1.0;
M_lnPSlwC    = 1.0;
M_lnPRBCPlasTCAC = 1.0;
M_lnPBodTCAC = 1.0;
M_lnPLivTCAC = 1.0;
M_lnkDissocC = 1.0;
M_lnBMaxkDC = 1.0;
M_lnPBodTCOHC = 1.0;
M_lnPLivTCOHC = 1.0;
M_lnPBodTCOGC = 1.0;
M_lnPLivTCOGC = 1.0;
M_lnPeffDCVG = 1.0;
M_lnPeffDCVC = 1.0; #(v2.0)
M_lnPeffDCA = 1.0; #(v2.0)
M_lnkTSD    = 1.0;
M_lnkAS     = 1.0;
M_lnkTD     = 1.0;
M_lnkAD     = 1.0;
M_lnkASTCA  = 1.0;
M_lnkASTCOH = 1.0;
M_lnVMaxC   = 1.0;
M_lnKMC     = 1.0;
M_lnClC     = 1.0;
M_lnFracOtherC = 1.0;
M_lnFracTCAC = 1.0;
M_lnVMaxDCVGC = 1.0;
M_lnClDCVGC = 1.0;
M_lnKMDCVGC = 1.0;
M_lnVMaxKidDCVGC = 1.0;
M_lnClKidDCVGC = 1.0;
M_lnKMKidDCVGC = 1.0;
#(v1.2) M_lnClClaraC = 1.0;
M_lnVMaxLungLivC = 1.0; #(v1.2)
M_lnKMClara = 1.0;

# inter-strain scaling
M_lnISOx = 0.0; # P450 oxidative metabolism
M_lnISTCA = 0.0; # fraction to TCA
M_lnISDCA = 0.0; # fraction to DCA
M_lnISConj = 0.0; # GSH conjugation metabolism
M_lnISkTCA = 0.0; # TCA metabolism/clearance
M_lnISkDCA = 0.0; # DCA metabolism/clearance
M_lnISkDCVG = 0.0; # DCVG -> DCVC
M_lnISkDCVC = 0.0; # DCVC clearance

```

```

#(v1.2) M_lnVMaxClearC = 1.0;
#(v1.2) M_lnKMClear    = 1.0;
M_lnFracLungSysC = 1.0;
M_lnVMaxTCOHC      = 1.0;
M_lnClTCOHC = 1.0;
M_lnKMTCOH = 1.0;
M_lnVMaxGlucC      = 1.0;
M_lnClGlucC = 1.0;
M_lnKMGluc = 1.0;
M_lnkMetTCOHC      = 1.0;
M_lnkUrnTCAC       = 1.0;
M_lnkMetTCAC       = 1.0;
M_lnkBileC = 1.0;
M_lnkEHRC = 1.0;
M_lnkUrnTCOGC      = 1.0;
M_lnFracKidDCVCC = 1.0;
M_lnkDCVGC = 1.0;
M_lnkElimDCVCC = 1.0;#(v2.0)
M_lnkClearDCAC = 1.0;#(v2.0)
M_lnkDCAcen_perC = 1.0;#(v2.0)
M_lnkDCAper_cenC = 1.0;#(v2.0)

*****
*****
# Population Variances
#
# These are given InvGamma(alpha,beta) distributions. The
parameterization
# for alpha and beta is given by:
# alpha = (n-1)/2
# beta = s^2*(n-1)/2
# where n = number of data points, and s^2 is the sample variance
# Sum(x_i^2)/n - <x>^2.
# Generally, for parameters for which there is no direct data, assume a
# value of n = 5 (alpha = 2). For a sample variance s^2, this gives
# an expected value for the standard deviation <sigma> = 0.9*s,
# a median [2.5%,97.5%] of 1.1*s [0.6*s,2.9*s].
#
V_lnQCC = 1.0;
V_lnVPRC = 1.0;
V_QFatC = 1.0;
V_QGutC = 1.0;
V_QLivC = 1.0;
V_QSlwC = 1.0;
#(v1.2) V_QTBC = 1.0;
V_QKidC = 1.0;
V_FracPlasC = 1.0;
V_lnDRespC = 1.0; # (v1.2)
V_VFatC = 1.0;
V_VGutC = 1.0;
V_VLivC = 1.0;
V_VRapC = 1.0;
#(v1.2) V_VTBC = 1.0;

```

```

V_VRespLumC = 1.0; #(v1.2)
V_VRespEffC = 1.0; #(v1.2)
V_VKidC      = 1.0;
V_VBldC      = 1.0;
V_lnPBC      = 1.0;
V_lnPFatC    = 1.0;
V_lnPGutC    = 1.0;
V_lnPLivC    = 1.0;
V_lnPRapC    = 1.0;
#(v1.2) V_lnPTBC = 1.0;
V_lnPRespC   = 1.0; #(v1.2)
V_lnPKidC    = 1.0;
V_lnPSlwC    = 1.0;
V_lnPRBCPlasTCAC = 1.0;
V_lnPBodTCAC = 1.0;
V_lnPLivTCAC = 1.0;
V_lnkDissocC = 1.0;
V_lnBMaxkDC = 1.0;
V_lnPBodTCOHC = 1.0;
V_lnPLivTCOHC = 1.0;
V_lnPBodTCOGC = 1.0;
V_lnPLivTCOGC = 1.0;
V_lnPeffDCVG = 1.0;
V_lnPeffDCVC = 1.0; #(v2.0)
V_lnPeffDCA = 1.0; #(v2.0)
V_lnkTSD    = 1.0;
V_lnkAS     = 1.0;
V_lnkTD     = 1.0;
V_lnkAD     = 1.0;
V_lnkASTCA  = 1.0;
V_lnkASTCOH = 1.0;
V_lnVMaxC   = 1.0;
V_lnKMC     = 1.0;
V_lnClC     = 1.0;
V_lnFracOtherC = 1.0;
V_lnFracTCAC = 1.0;
V_lnVMaxDCVGC = 1.0;
V_lnClDCVGC = 1.0;
V_lnKMDCVGC = 1.0;
V_lnVMaxKidDCVGC = 1.0;
V_lnClKidDCVGC = 1.0;
V_lnKMKidDCVGC = 1.0;
#(v1.2) V_lnClClaraC = 1.0;
V_lnVMaxLungLivC = 1.0; #(v1.2)
V_lnKMClara = 1.0;

# inter-strain scaling
V_lnISOx = 1.0; # P450 oxidative metabolism
V_lnISTCA = 1.0; # fraction to TCA
V_lnISDCA = 1.0; # fraction to DCA
V_lnISConj = 1.0; # GSH conjugation metabolism
V_lnISkTCA = 1.0; # TCA metabolism/clearance
V_lnISkDCA = 1.0; # DCA metabolism/clearance
V_lnISkDCVG = 1.0; # DCVG -> DCVC

```

```
V_lnISkDCVC = 1.0; # DCVC clearance
```

```
 #(v1.2) V_lnVMaxClearC = 1.0;
 #(v1.2) V_lnKMClear    = 1.0;
 V_lnFracLungSysC      = 1.0;
 V_lnVMaxTCOHC         = 1.0;
 V_lnClTCOHC           = 1.0;
 V_lnKMTCOH            = 1.0;
 V_lnVMaxGlucC         = 1.0;
 V_lnClGlucC           = 1.0;
 V_lnKMGluc            = 1.0;
 V_lnkMetTCOHC         = 1.0;
 V_lnkUrnTCAC          = 1.0;
 V_lnkMetTCAC          = 1.0;
 V_lnkBileC            = 1.0;
 V_lnkEHRC             = 1.0;
 V_lnkUrnTCOGC         = 1.0;
 V_lnFracKidDCVCC      = 1.0;
 V_lnkDCVGC            = 1.0;
 V_lnkElimDCVCC        = 1.0; #(v2.0)
 V_lnkClearDCAC        = 1.0; #(v2.0)
 V_lnkDCAcen_perC      = 1.0; #(v2.0)
 V_lnkDCAper_cenC      = 1.0; #(v2.0)
```

```
*****
*****
```

```
# Measurement error variances for output
```

```
 #(v1.2) Ve_AlvRet= 1;
```

```
Ve_RetDose = 1;
Ve_CAlv    = 1;
Ve_CAlvPPM = 1;
Ve_CInhPPM = 1;
Ve_CInh     = 1;
Ve_CMixExh = 1;
Ve_CArt     = 1;
Ve_CVen     = 1;
Ve_CBldMix  = 1;
```

```
Ve_CFat     = 1;
Ve_CGut     = 1;
Ve_CRap     = 1;
Ve_CSlw     = 1;
 #(v1.2) Ve_CTB = 1;
Ve_CHrt     = 1;
Ve_CKid     = 1;
Ve_CLiv     = 1;
Ve_CLung    = 1;
Ve_CMus     = 1;
Ve_CSpl     = 1;
Ve_CBrn     = 1;
Ve_zAExh    = 1;
```

```

Ve_zAExhpost      = 1;

Ve_CTCOH          = 1;
Ve_CKidTCOH      = 1;
Ve_CLivTCOH      = 1;
Ve_CLungTCOH     = 1;

Ve_CPlasTCA      = 1;
Ve_CBldTCA       = 1;
Ve_CBodTCA       = 1;
Ve_CKidTCA       = 1;
Ve_CLivTCA       = 1;
Ve_CLungTCA      = 1;
Ve_zAUrnTCA      = 1;
Ve_zAUrnTCA_collect = 1;
Ve_zAUrnTCA_sat  = 1;

Ve_zABileTCOG    = 1;
Ve_CTCOG         = 1;
Ve_CTCOGTCOH     = 1;
Ve_CKidTCOGTCOH = 1;
Ve_CLivTCOGTCOH = 1;
Ve_CLungTCOGTCOH = 1;
Ve_AUrnTCOGTCOH = 1;
Ve_AUrnTCOGTCOH_collect = 1;

Ve_AUrnTCOGTCOH_sat = 1;

Ve_CDCVGmol = 1;#(v2.0)
Ve_CDCVCmol = 1;#(v2.0)
Ve_CDCAmol  = 1;#(v2.0)
Ve_AUrnTCTotMole = 1;
Ve_TotCTCOH = 1;
Ve_QPsamp   = 1;

#*****
#*****
#***          Defaults for input parameters
#***
#*****
#*****
##-- TCE dosing
  Conc = 0.0;# Inhalation exposure conc. (ppm)
  IVDose = 0.0; # IV dose (mg/kg)
  PDose = 0.0; # Oral gavage dose (mg/kg)
  Drink = 0.0; # Drinking water dose (mg/kg/day)
  IADose = 0.0; # Intraarterial dose (mg/kg)
  PVDose = 0.0; # Portal vein dose (mg/kg)
##-- TCA dosing
  IVDoseTCA = 0.0;# IV dose (mg/kg) of TCA

```

```

    PODoseTCA = 0.0;# Oral dose (mg/kg) of TCA
##-- TCOH dosing
    IVDoseTCOH = 0.0;# IV dose (mg/kg) of TCOH
    PODoseTCOH = 0.0;# Oral dose (mg/kg) of TCOH
##-- Potentially time-varying parameters
    QPmeas = 0.0;    # Measured value of Alveolar ventilation QP
    TCAUrnSat = 0.0;# Flag for saturated TCA urine
    TCOGUrnSat = 0.0;# Flag for saturated TCOG urine
    UrnMissing = 0.0;# Flag for missing urine collection times

Initialize {

#*****
#*****
#***          Parameter Initialization and Scaling
#***
#*****
#*****
# Model Parameters (used in dynamics):
#   QC          Cardiac output (L/hr)
#   VPR         Ventilation-perfusion ratio
#   QPsamp      Alveolar ventilation (L/hr)
#   QFatCtmp    Scaled fat blood flow
#   QGutCtmp    Scaled gut blood flow
#   QLivCtmp    Scaled liver blood flow
#   QSlwCtmp    Scaled slowly perfused blood flow
#(v1.2)   QTBCtmp    Scaled tracheo-bronchial blood flow
#   DResptmp    Respiratory lumen:tissue diffusive clearance rate
#   QKidCtmp    Scaled kidney blood flow
#   FracPlas    Fraction of blood that is plasma (1-hematocrit)
#   VFat        Fat compartment volume (L)
#   VGut        Gut compartment volume (L)
#   VLiv        Liver compartment volume (L)
#   VRap        Rapidly perfused compartment volume (L)
#(v1.2)   VTB        Tracheo-bronchial compartment volume (L)
#   VRespLum    Volume of respiratory lumen (L air)
#   VRespEff    Effective volume of respiratory tissue (L air)
#   VKid        Kidney compartment volume (L)
#   VBld        Blood compartment volume (L)
#   VSlw        Slowly perfused compartment volume (L)
#   VPlas       Plasma compartment volume [fraction of blood] (L)
#   VBod        TCA Body compartment volume [not incl. blood+liver] (L)
#   VBodTCOH    TCOH/G Body compartment volume [not incl. liver] (L)
#   PB          TCE Blood/air partition coefficient
#   PFat        TCE Fat/Blood partition coefficient
#   PGut        TCE Gut/Blood partition coefficient
#   PLiv        TCE Liver/Blood partition coefficient
#   PRap        TCE Rapidly perfused/Blood partition coefficient
#(v1.2)   PTB        TCE Tracheo-bronchial/Blood partition coefficient
#   PResp       TCE Respiratory tissue:air partition coefficient
#   PKid        TCE Kidney/Blood partition coefficient
#   PSlw        TCE Slowly perfused/Blood partition coefficient
#   TCAPlas     TCA blood/plasma concentration ratio
#   PBodTCA     Free TCA Body/blood plasma partition coefficient

```

```

#      PLivTCA          Free TCA Liver/blood plasma partition coefficient
#      kDissoc          Protein/TCA dissociation constant (umole/L)
#      BMax            Maximum binding concentration (umole/L)
#      PBodTCOH        TCOH body/blood partition coefficient
#      PLivTCOH        TCOH liver/body partition coefficient
#      PBodTCOG        TCOG body/blood partition coefficient
#      PLivTCOG        TCOG liver/body partition coefficient
#      kAS             TCE Stomach absorption coefficient (/hr)
#      kTSD            TCE Stomach-duodenum transfer coefficient (/hr)
#      kAD             TCE Duodenum absorption coefficient (/hr)
#      kTD            TCE Duodenum-feces transfer coefficient (/hr)
#      kASTCA          TCA Stomach absorption coefficient (/hr)
#      kASTCOH         TCOH Stomach absorption coefficient (/hr)
#      VMax           VMax for hepatic TCE oxidation (mg/hr)
#      KM             KM for hepatic TCE oxidation (mg/L)
#      FracOther      Fraction of hepatic TCE oxidation not to TCA+TCOH
#      FracTCA        Fraction of hepatic TCE oxidation to TCA
#      VMaxDCVG       VMax for hepatic TCE GSH conjugation (mg/hr)
#      KMDCVG         KM for hepatic TCE GSH conjugation (mg/L)
#      VMaxKidDCVG    VMax for renal TCE GSH conjugation (mg/hr)
#      KMKidDCVG     KM for renal TCE GSH conjugation (mg/L)
#      VMaxClara      VMax for Tracheo-bronchial TCE oxidation (mg/hr)
#      KMClara        KM for Tracheo-bronchial TCE oxidation (mg/L)
#(v1.2)      VMaxClear VMax for Tracheo-bronchial CH clearance (mg/hr)
#(v1.2)      KMClear   KM for Tracheo-bronchial CH clearance (mg/L)
#      FracLungSys    Fraction of respiratory metabolism to systemic circ.
#      VMaxTCOH       VMax for hepatic TCOH->TCA (mg/hr)
#      KMTCOH         KM for hepatic TCOH->TCA (mg/L)
#      VMaxGluc       VMax for hepatic TCOH->TCOG (mg/hr)
#      KMGluc         KM for hepatic TCOH->TCOG (mg/L)
#      kMetTCOH       Rate constant for hepatic TCOH->other (/hr)
#      kUrnTCA        Rate constant for TCA plasma->urine (/hr)
#      kMetTCA        Rate constant for hepatic TCA->other (/hr)
#      kBile          Rate constant for TCOG liver->bile (/hr)
#      kEHR           Lumped rate constant for TCOG bile->TCOH liver (/hr)
#      kUrnTCOG       Rate constant for TCOG->urine (/hr)
#      kDCVG          Rate constant for hepatic DCVG->DCVC (/hr)
#      FracKidDCVC    Fraction of renal TCE GSH conj. "directly" to DCVC
#                    (i.e., via first pass)
#      VDCVG          DCVG effective volume of distribution
#      VDCVC          DCVC effective volume of distribution#(v2.0)
#      VDCA           DCA effective volume of distribution#(v2.0)
#      kElimDCVC      Lumped rate constant for DCVC elimination (/hr)#(v2.0)
#      kClearDCA      Rate constant for DCA elimination (/hr)#(v2.0)
#      kDCAcen_per    Rate constant for DCA central->peripheral (/hr)#(v2.0)
#      kDCAper_cen    Rate constant for DCA peripheral->central (/hr)#(v2.0)
#      Rodents        Number of rodents in closed chamber data
#      VCh            Chamber volume for closed chamber data
#      kLoss          Rate constant for closed chamber air loss
# Parameters used (not assigned here)
#      BW            Body weight in kg
#      Species        1 = human (default), 2 = rat, 3 = mouse
#      Male           0 = female, 1 (default) = male
#      CC            Closed chamber initial concentration

```

```

# Sampling/scaling parameters (assigned or sampled)
#   lnQCC
#   lnVPRC
#   lnDRespC
#   QFatC
#   QGutC
#   QLivC
#   QSlwC
# (v1.2)   QTBC
#   QKidC
#   FracPlasC
#   VFatC
#   VGutC
#   VLivC
#   VRapC
# (v1.2)   VTBC
#   VRespLumC
#   VRespEffC
#   VKidC
#   VBldC
#   lnPBC
#   lnPFatC
#   lnPGutC
#   lnPLivC
#   lnPRapC
#   lnPSlwC
# (v1.2)   lnPTBC
#   lnPRespC
#   lnPKidC
#   lnPRBCPlasTCAC
#   lnPBodTCAC
#   lnPLivTCAC
#   lnkDissocC
#   lnBMaxkDC
#   lnPBodTCOHC
#   lnPLivTCOHC
#   lnPBodTCOGC
#   lnPLivTCOGC
#   lnPeffDCVG
#   lnPeffDCVC# (v2.0)
#   lnPeffDCA# (v2.0)
#   lnkTSD
#   lnkAS
#   lnkTD
#   lnkAD
#   lnkASTCA
#   lnkASTCOH
#   lnVMaxC
#   lnKMC
#   lnClC
#   lnFracOtherC
#   lnFracTCAC
#   lnVMaxDCVGC
#   lnClDCVGC

```

```

# lnKMDCVGC
# lnVMaxKidDCVGC
# lnClKidDCVGC
# lnKMKidDCVGC
#(v1.2) lnClClaraC
# lnVMaxLungLivC
# lnKMClara
#(v1.2) lnVMaxClearC
#(v1.2) lnKMClear
# lnFracLungSysC
# lnVMaxTCOHC
# lnClTCOHC
# lnKMTCOH
# lnVMaxGlucC
# lnClGlucC
# lnKMGluc
# lnkMetTCOHC
# lnkUrnTCAC
# lnkMetTCAC
# lnkBileC
# lnkEHRC
# lnkUrnTCOGC
# lnFracKidDCVCC
# lnkDCVGC
# lnkElimDCVCC#(v2.0)
# NRodents
# VChC
# lnkLossC
# Input parameters
# none
# Notes:
#*****
# use measured value of > 0, otherwise use 0.03 for mouse,
# 0.3 for rat, 60 for female human, 70 for male human
BW = (BWmeas > 0.0 ? BWmeas : (Species == 3 ? 0.03 : (Species == 2
? 0.3 : (Male == 0 ? 60.0 : 70.0) )));

BW75 = pow(BW, 0.75);
BW25 = pow(BW, 0.25);

# Cardiac Output and alveolar ventilation (L/hr)
QC = exp(lnQCC) * BW75 * # Mouse, Rat, Human (default)
(Species == 3 ? 11.6 : (Species == 2 ? 13.3 : 16.0 ));
# Mouse: CO=13.98 +/- 2.85 ml/min, BW=30 g (Brown et al. 1997, Tab.
22)
# Uncertainty CV is 0.20
# Rat: CO=110.4 ml/min +/- 15.6, BW=396 g (Brown et al. 1997, Tab.
22,
# p 441). Uncertainty CV is 0.14.
# Human: Average of Male CO=6.5 l/min, BW=73 kg
# and female CO= 5.9 l/min, BW=60 kg (ICRP #89, sitting at
rest)

```

```

# From Price et al. 2003, estimates of human perfusion rate
were
# 4.7~6.5 for females and 5.5~7.1 l/min for males (note
# portal blood was double-counted, and subtracted off here)
# Thus for uncertainty use CV of 0.2, truncated at 4xCV
# Variability from Price et al. (2003) had CV of 0.14~0.20,
# so use 0.2 as central estimate
VPR = exp(lnVPRC)*
      (Species == 3 ? 2.5 : (Species == 2 ? 1.9 : 0.96 ));
# Mouse: QP/BW=116.5 ml/min/100 g (Brown et al. 1997, Tab. 31),
VPR=2.5
# Assume uncertainty CV of 0.2 similar to QC, truncated at 4xCV
# Consistent with range of QP in Tab. 31
# Rat: QP/BW=52.9 ml/min/100 g (Brown et al. 1997, Tab. 31),
VPR=1.9
# Assume uncertainty CV of 0.3 similar to QC, truncated at 4xCV
# Used larger CV because Tab. 31 shows a very large range of QP
# Human: Average of Male VE=9 l/min, resp. rate=12 /min,
# dead space=0.15 l (QP=7.2 l/min), and Female
# VE=6.5 l/min, resp. rate=14 /min, dead space=0.12 l
# (QP=4.8 l/min), VPR = 0.96
# Assume uncertainty CV of 0.2 similar to QC, truncated at 4xCV
# Consistent with range of QP in Tab. 31
QPsamp = QC*VPR;

#(v1.2) Respiratory diffusion flow rate
# Will be scaled by QP in dynamics
# Use log-uniform distribution from 1e-5 to 10
DResptmp = exp(lnDRespC);

# Fractional Flows scaled to the appropriate species
# Fat = Adipose only
# Gut = GI tract + pancreas + spleen (all drain to portal vein)
# Liv = Liver, hepatic artery
# Slw = Muscle + Skin
# TB = Bronchial blood flow #(v1.2) -- deleted
# Kid = Kidney
# Rap = Rapidly perfused (rest of organs, plus bone marrow, lymph, etc.),
# derived by difference in dynamics
#
# Mouse and rat data from Brown et al. (1997). Human data from
# ICRP-89 (2002), and is sex-specific.

QFatCtmp = QFatC*
  (Species == 3 ? 0.07 : (Species == 2 ? 0.07 : (Male == 0 ? 0.085 :
0.05) ));
QGutCtmp = QGutC*
  (Species == 3 ? 0.141 : (Species == 2 ? 0.153 : (Male == 0 ? 0.21 :
0.19) ));
QLivCtmp = QLivC*
  (Species == 3 ? 0.02 : (Species == 2 ? 0.021 : 0.065 ));
QSlwCtmp = QSlwC*
  (Species == 3 ? 0.217 : (Species == 2 ? 0.336 : (Male == 0 ? 0.17 :
0.22) ));

```

```

#(v1.2)      QTBCtmp = QTBC*
#(v1.2)      (Species == 3 ? 0.005 : (Species == 2 ? 0.021 : 0.025
));
      QKidCtmp = QKidC*
      (Species == 3 ? 0.091 : (Species == 2 ? 0.141 : (Male == 0 ?
0.17 : 0.19) ));

# Plasma Flows to Tissues (L/hr)
## Mice and rats from Hejtmancik et al. 2002,
## control F344 rats and B6C3F1 mice at 19 weeks of age
## However, there appear to be significant strain differences in rodents,
so
## assume uncertainty CV=0.2 and variability CV=0.2.
## Human central estimate from ICRP. Well measured in humans, from Price
et al.,
## human SD in hematocrit was 0.029 in females, 0.027 in males,
## corresponding to FracPlas CV of 0.047 in females and
## 0.048 in males. Use rounded CV = 0.05 for both uncertainty and
variability
## Use measured 1-hematocrit if available
## Truncate distributions at 3xCV to encompass clinical "normal range"
      FracPlas = (Hematocritmeas > 0.0 ? (1-Hematocritmeas) : (FracPlasC
*
      (Species == 3 ? 0.52 : (Species == 2 ? 0.53 : (Male == 0 ? 0.615 :
0.567))))));

# Tissue Volumes (L)
# Fat = Adipose only
# Gut = GI tract (not contents) + pancreas + spleen (all drain to portal
vein)
# Liv = Liver
# Rap = Brain + Heart + (Lungs-TB) + Bone marrow + "Rest of the body"
# TB = Tracheobroncial region (trachea+broncial basal+
# broncial secretory+bronchiolar) #(v1.2) replaced by VResp
# Kid = Kidney
# Bld = Blood
# Slw = Muscle + Skin, derived by difference
# residual (assumed unperfused) = (Bone-Marrow)+GI contents+other
#
# Mouse and rat data from Brown et al. (1997). Human data from
# ICRP-89 (2002), and is sex-specific.

      VFat = BW * (VFatCmeas > 0.0 ? VFatCmeas : (VFatC * (Species == 3
? 0.07 : (Species == 2 ? 0.07 : (Male == 0 ? 0.317 : 0.199) ))));
      VGut = VGutC * BW *
      (Species == 3 ? 0.049 : (Species == 2 ? 0.032 : (Male == 0 ? 0.022
: 0.020) ));
      VLiv = VLivC * BW *
      (Species == 3 ? 0.055 : (Species == 2 ? 0.034 : (Male == 0 ? 0.023
: 0.025) ));
      VRap = VRapC * BW * ## VRaptmp = VRapC * BW * #(v1a)#(v1b)#(v1c)
-- temporary variable
      (Species == 3 ? 0.100 : (Species == 2 ? 0.088 : (Male == 0 ? 0.093
: 0.088) ));

```

```

#(v1.2)          VTB = VTBC * BW *
#(v1.2)          (Species == 3 ? 0.0007 : (Species == 2 ? 0.0005 : 0.00018 ));
                VRespLum = VRespLumC * BW *
                (Species == 3 ? (0.00014/0.03) : (Species == 2 ? (0.0014/0.3) :
(0.167/70) )); #(v1.2) Lumenal volumes from Styrene model (Sarangapani et
al. 2002)
                VRespEfftmp = VRespEffC * BW *
                (Species == 3 ? 0.0007 : (Species == 2 ? 0.0005 : 0.00018 ));
#(v1.2) Respiratory tract volume is TB region
#(v1.2) will be multiplied by partition coef. below
                ## VRap = VRaptmp + VTB; #(v1b) -- add TB to rapidly
perfused
                VKid = VKidC * BW *
                (Species == 3 ? 0.017 : (Species == 2 ? 0.007 : (Male == 0 ? 0.0046
: 0.0043) ));
                VBld = VBldC * BW *
                (Species == 3 ? 0.049 : (Species == 2 ? 0.074 : (Male == 0 ? 0.068
: 0.077) ));
                ## VRap = VRaptmp + VBld; #(v1a) -- add Bld to rapidly
perfused
                ## VRap = VRaptmp + VTB + VBld; #(v1c) -- add TB and Bld
to Rap
#(v1.2)          VSlw = (Species == 3 ? 0.8897 : (Species == 2 ? 0.8995 :
(Male == 0 ? 0.85778 : 0.856))) * BW
#(v1.2)          - VFat - VGut - VLiv - VRap - VTB - VKid - VBld;
                VSlw = (Species == 3 ? 0.8897 : (Species == 2 ? 0.8995 : (Male ==
0 ? 0.85778 : 0.856))) * BW
                - VFat - VGut - VLiv - VRap - VRespEfftmp - VKid - VBld;
                #(v1.2) replaced VTB by VRespEfftmp
                ## - VFat - VGut - VLiv - VRaptmp - VTB - VKid - VBld;
#(v1a)#(v1b)#(v1c)
# Slowly perfused:
# Baseline mouse: 0.8897-0.049-0.017-0.0007-0.1-0.055-0.049-0.07= 0.549
# Baseline rat: 0.8995 -0.074-0.007-0.0005-0.088-0.034-0.032-0.07= 0.594
# Baseline human F: 0.85778-0.068-0.0046-0.00018-0.093-0.023-0.022-0.317=
0.33
# Baseline human M: 0.856-0.077-0.0043-0.00018-0.088-0.025-0.02-0.199=
0.4425

                VPlas = FracPlas * VBld;
#(v1.2)          VBod = VFat + VGut + VRap + VTB + VKid + VSlw; # For TCA
                VBod = VFat + VGut + VRap + VRespEfftmp + VKid + VSlw; # For TCA
                ## VFat + VGut + VRap + VTB + VKid + VSlw + VBld; #(v1h)
                ## VFat + VGut + VRaptmp + VTB + VKid + VSlw;
#(v1a)#(v1b)#(v1c) For TCA
                ## VFat + VGut + VRaptmp + VTB + VKid + VSlw +
VBld; #(v1a) (v1b) + (v1h)
                VBodTCOH = VBod + VBld;          # for TCOH and TCOG -- body without
liver
                ## VBodTCOH = VBod; #(v1h)

# Partition coefficients

```

```

PB = (PBmeas > 0.0 ? PBmeas : (exp(lnPBC) * (Species == 3 ? 15. :
(Species == 2 ? 22. : 9.5 )))); # Blood-air
# Mice: pooling Abbas and Fisher 1997, Fisher et al. 1991
#   each a single measurement, with overall CV = 0.07.
#   Given small number of measurements, and variability
#   in rat, use CV of 0.25 for uncertainty and variability.
# Rats: pooling Sato et al. 1977, Gargas et al. 1989,
#   Barton et al. 1995, Simmons et al. 2002, Koizumi 1989,
#   Fisher et al. 1989. Fisher et al. measurement substantially
#   smaller than others (15 vs. 21~26). Recent article
#   by Rodriguez et al. 2007 shows significant change with
#   age (13.1 at PND10, 17.5 at adult, 21.8 at aged), also seems
#   to favor lower values than previously reported. Therefore
#   use CV = 0.25 for uncertainty and variability.
# Humans: pooling Sato and Nakajima 1979, Sato et al. 1977,
#   Gargas et al. 1989, Fiserova-Bergerova et al. 1984,
#   Fisher et al. 1998, Koizumi 1989
#   Overall variability CV = 0.185. Consistent with
#   within study inter-individual variability CV = 0.07~0.22.
#   Study-to-study, sex-specific means range 8.1~11, so
#   uncertainty CV = 0.2.
PFat = exp(lnPFatC) * # Fat/blood
      (Species == 3 ? 36. : (Species == 2 ? 27. : 67. ));
# Mice: Abbas and Fisher 1997. Single measurement. Use
#   rat uncertainty of CV = 0.3.
# Rats: Pooling Barton et al. 1995, Sato et al. 1977,
#   Fisher et al. 1989. Recent article by Rodriguez et al.
#   (2007) shows higher value of 36., so assume uncertainty
#   CV of 0.3.
# Humans: Pooling Fiserova-Bergerova et al. 1984, Fisher et al.
1998,
#   Sato et al. 1977. Variability in Fat:Air has CV = 0.07.
#   For uncertainty, dominated by PB uncertainty CV = 0.2
#   For variability, add CVs in quadrature for
#   sqrt(0.07^2+0.185^2)=0.20
PGut = exp(lnPGutC) * # Gut/blood
      (Species == 3 ? 1.9 : (Species == 2 ? 1.4 : 2.6 ));
# Mice: Geometric mean of liver, kidney
# Rats: Geometric mean of liver, kidney
# Humans: Geometric mean of liver, kidney
#   Uncertainty of CV = 0.4 due to tissue extrapolation
PLiv = exp(lnPLivC) * # Liver/blood
      (Species == 3 ? 1.7 : (Species == 2 ? 1.5 : 4.1 ));
# Mice: Fisher et al. 1991, single datum, so assumed uncert CV =
0.4
# Rats: Pooling Barton et al. 1995, Sato et al. 1977,
#   Fisher et al. 1989, with little variation (range 1.3~1.7).
#   Recent article by Rodriguez et al. reports 1.34. Use
#   uncertainty CV = 0.15.
# Humans: Pooling Fiserova-Bergerova et al. 1984, Fisher et al.
1998
#   almost 2-fold difference in Liver:Air values, so uncertainty
#   CV = 0.4
PRap = exp(lnPRapC) * # Rapidly perfused/blood

```

```

        ## PRaptmp = exp(lnPRapC) * #(v1a)#(v1b)#(v1c) --
temporary
    (Species == 3 ? 1.9 : (Species == 2 ? 1.3 : 2.6 ));
# Mice: Similar to liver, kidney. Uncertainty CV = 0.4 due to
# tissue extrapolation
# Rats: Use brain values Sato et al. 1977. Recent article by
# Rodriguez et al. (2007) reports 0.99 for brain. Uncertainty
# CV of 0.4 due to tissue extrapolation.
# Humans: Use brain from Fiserova-Bergerova et al. 1984
# Uncertainty of CV = 0.4 due to tissue extrapolation
#(v1.2) PTB = exp(lnPTBC) * # TB/blood
#(v1.2) (Species == 3 ? 2.6 : (Species == 2 ? 1.0 : 1.3 ));
    PResp = exp(lnPRespC) * # Resp/blood =
    (Species == 3 ? 2.6 : (Species == 2 ? 1.0 : 1.3 ));
# Mice: Abbas and Fisher 1997, single datum, so assumed uncert CV =
0.4
# Rats: Sato et al. 1977, single datum, so assumed uncert CV = 0.4
# Humans: Pooling Fiserova-Bergerova et al. 1984, Fisher et al.
1998
# > 2-fold difference in lung:air values, so uncertainty
# CV = 0.4
    VRespEff = VRespEfftmp * PResp * PB; #(v1.2) Effective air volume
        ## PRap = (PRaptmp*VRaptmp + VBld)/VRap; #(v1a)
        ## #(v1a) adjust PC for blood
        ## PRaptmp2 = (PRaptmp*VRaptmp + VBld)/VRap;
#(v1c)
        ## #(v1c) first adjust PC for blood
        ## QRapCtmp = 1 - QFatCtmp - QGutCtmp - QLivCtmp
#(v1b)#(v1c)
        ## - QSlwCtmp - QTBCtmp - QKidCtmp;
#(v1b)#(v1c)
        ## PRap = (QRapCtmp+QTBCtmp)/(QRapCtmp/PRaptmp
#(v1b)
        ## + QTBCtmp/PTB); #(v1b) -- adjust PC for TB
        ## PRap = (QRapCtmp+QTBCtmp)/(QRapCtmp/PRaptmp2
#(v1c)
        ## + QTBCtmp/PTB); #(v1c) -- then adjust PC for
TB
    PKid = exp(lnPKidC) * # Slowly perfused/blood
    (Species == 3 ? 2.1 : (Species == 2 ? 1.3 : 1.6 ));
# Mice: Abbas and Fisher 1997, single datum, so assumed uncert CV =
0.4
# Rats: Pooling Barton et al. 1995, Sato et al. 1977. Recent
article
# by Rodriguez et al. (2007) reports 1.01, so use uncertainty
# CV of 0.3. Pooled variability CV = 0.39.
# Humans: Pooling Fiserova-Bergerova et al. 1984, Fisher et al.
1998
# For uncertainty, dominated by PB uncertainty CV = 0.2
# Variability in kidney:air CV = 0.23, so add to PB variability
# in quadrature sqrt(0.23^2+0.185^2)=0.30
    PSlw = exp(lnPSlwC) * # Slowly perfused/blood
    (Species == 3 ? 2.4 : (Species == 2 ? 0.58 : 2.1 ));
# Mice: Muscle - Abbas and Fisher 1997, single datum, so assumed

```

```

#      uncert CV = 0.4
# Rats: Pooling Barton et al. 1995, Sato et al. 1977,
#      Fisher et al. 1989.  Recent article by Rodriguez et al.
(2007)
#      reported 0.72, so use uncertainty CV of 0.25.  Variability
#      in Muscle:air and muscle:blood ~ CV = 0.3
# Humans: Pooling Fiserova-Bergerova et al. 1984, Fisher et al.
1998
#      Range of values 1.4~2.4, so uncertainty CV = 0.3
#      Variability in muscle:air CV = 0.3, so add to PB variability
#      in quadrature sqrt(0.3^2+0.185^2)=0.35

# TCA partitioning
TCAPlas = FracPlas + (1 - FracPlas) * 0.5 * exp(lnPRBCPlasTCAC);
#      Blood/Plasma concentration ratio.  Note dependence
#      on fraction of blood that is plasma.  Here
#      exp(lnPRBCPlasTCA) = partition coefficient
#      C(blood minus plasma)/C(plasma)
#      Default of 0.5, corresponding to Blood/Plasma
#      concentration ratio of 0.76 in
#      rats (Schultz et al 1999)
#      For rats, Normal uncertainty with GSD = 1.4
#      For mice and humans, diffuse prior uncertainty of
#      100-fold up/down
PBodTCA = TCAPlas * exp(lnPBodTCAC) *
          (Species == 3 ? 0.88 : (Species == 2 ? 0.88 : 0.52 ));
# Note -- these were done at 10~20 microg/ml (Abbas and Fisher
1997),
#      which is 1.635-3.27 mmol/ml (1.635-3.27 x 10^6 microM).
#      At this high concentration, plasma binding should be
#      saturated -- e.g., plasma albumin concentration was
#      measured to be P=190-239 microM in mouse, rat, and human
#      plasma by Lumpkin et al. 2003, or > 6800 molecules of
#      TCA per molecule of albumin.  So the measured partition
#      coefficients should reflect free blood-tissue partitioning.
# Used muscle values, multiplied by blood:plasma ratio to get
#      Body:Plasma partition coefficient
# Rats = mice from Abbas and Fisher 1997
# Humans from Fisher et al. 1998
#      Uncertainty in mice, humans GSD = 1.4
#      For rats, GSD = 2.0, based on difference between mice
#      and humans.
PLivTCA = TCAPlas * exp(lnPLivTCAC) *
          (Species == 3 ? 1.18 : (Species == 2 ? 1.18 : 0.66 ));
# Multiplied by blood:plasma ratio to get Liver:Plasma
# Rats = mice from Abbas and Fisher 1997
# Humans from Fisher et al. 1998
#      Uncertainty in mice, humans GSD = 1.4
#      For rats, GSD = 2.0, based on difference between mice
#      and humans.

# Binding Parameters for TCA
# GM of Lumpkin et al. 2003; Schultz et al. 1999;
#      Templin et al. 1993, 1995; Yu et al. 2000

```

```

# Protein/TCA dissociation constant (umole/L)
#   note - GSD = 3.29, 1.84, and 1.062 for mouse, rat, human
kDissoc = exp(lnkDissoc) *
  (Species == 3 ? 107. : (Species == 2 ? 275. : 182. ));
# BMax = NSites * Protein concentration.  Sampled parameter is
#   BMax/kD (determines binding at low concentrations)
#   note - GSD = 1.64, 1.60, 1.20 for mouse, rat, human
BMax = kDissoc * exp(lnBMaxkDC) *
  (Species == 3 ? 0.88 : (Species == 2 ? 1.22 : 4.62 ));

# TCOH partitioning
# Data from Abbas and Fisher 1997 (mouse) and Fisher et al.
#   1998 (human).  For rat, used mouse values.
#   Uncertainty in mice, humans GSD = 1.4
#   For rats, GSD = 2.0, based on difference between mice
#   and humans.

PBodTCOH = exp(lnPBodTCOHC) *
  (Species == 3 ? 1.11 : (Species == 2 ? 1.11 : 0.91 ));
PLivTCOH = exp(lnPLivTCOHC) *
  (Species == 3 ? 1.3 : (Species == 2 ? 1.3 : 0.59 ));

# TCOG partitioning
# Use TCOH as a proxy, but uncertainty much greater
# (e.g., use uniform prior, 100-fold up/down)
PBodTCOG = exp(lnPBodTCOGC) *
  (Species == 3 ? 1.11 : (Species == 2 ? 1.11 : 0.91 ));
PLivTCOG = exp(lnPLivTCOGC) *
  (Species == 3 ? 1.3 : (Species == 2 ? 1.3 : 0.59 ));

# DCVG distribution volume
# exp(lnPeffDCVG) is the effective partition coefficient for
# the "body" (non-blood) compartment
# Diffuse prior distribution: loguniform 1e-3 to 1e3
VDCVG = VBld + # blood plus body (with "effective" PC)
exp(lnPeffDCVG) * (VBod + VLiv);

# DCVC distribution volume#(v2.0)
# exp(lnPeffDCVC) is the effective partition coefficient for#(v2.0)
# the "body" (non-blood) compartment#(v2.0)
# Diffuse prior distribution: loguniform 1e-3 to 1e3#(v2.0)
VDCVC = VBld + # blood plus body (with "effective" PC)#(v2.0)
exp(lnPeffDCVC) * (VBod + VLiv);#(v2.0)

# DCA distribution volume#(v2.0)
# exp(lnPeffDCA) is the effective partition coefficient for#(v2.0)
# the "body" (non-blood) compartment#(v2.0)
# Diffuse prior distribution: loguniform 1e-3 to 1e3#(v2.0)
VDCA = VBld + # blood plus body (with "effective" PC)#(v2.0)
exp(lnPeffDCA) * (VBod + VLiv);#(v2.0)

# Absorption Rate Constants (/hr)
# All priors are diffuse (log)uniform distributions

```

```

# transfer from stomach centered on 1.4/hr, range up or down 100-
fold,
#     based on human stomach half-time of 0.5 hr.
    kTSD = exp(lnkTSD);
# stomach absorption centered on 1.4/hr, range up or down 1000-fold
kAS = exp(lnkAS);
# assume no fecal excretion -- 100% absorption
kTD = 0.0 * exp(lnkTD);
# intestinal absorption centered on 0.75/hr, range up or down
#     1000-fold, based on human transit time of small intestine
#     of 4 hr     (95% throughput in 4 hr)
kAD = exp(lnkAD);
kASTCA = exp(lnkASTCA);
kASTCOH = exp(lnkASTCOH);

# Background
    TCABgd = (lnTCABgd > -30 ? exp(lnTCABgd) : 0);
    DCABgd = (lnDCABgd > -30 ? exp(lnDCABgd) : 0);

# TCE Oxidative Metabolism Constants
# For rodents, in vitro microsomal data define priors (pooled).
# For human, combined in vitro microsomoal+hepatocellular individual data
#     define priors.
# All data from Elfarra et al. 1998; Lipscomb et al. 1997, 1998a,b
# For VMax, scaling from in vitro data were (Barter et al. 2007):
#     32 mg microsomal protein/g liver
#     99 x 1e6 hepatocytes/g liver
#     Here, human data assumed representative of mouse and rats.
# For KM, two different scaling methods were used for microsomes:
#     Assume microsomal concentration = liver concentration, and
#         use central estimate of liver:blood PC (see above)
#     Use measured micrososome:air partition coefficient (1.78) and
#         central estimate of blood:air PC (see above)
# For human KM from hepatocytes, used measured human hepatocyte:air
#     partition coefficient (21.62, Lipscomb et al. 1998), and
#     central estimate of blood:air PC.
#     Note that to that the hepatocyte:air PC is similar to that
#     found in liver homogenates (human: 29.4+/-5.1 from Fiserova-
#     Bergerova et al. 1984, and 54 for Fisher et al. 1998; rat:
#     27.2+/-3.4 from Gargas et al. 1989, 62.7 from Koisumi 1989,
#     43.6 from Sato et al. 1977; mouse: 23.2 from Fisher et al. 1991).
# For humans, sampled parameters are VMax and ClC (VMax/KM), due to
#     improved convergence. VMax is kept as a parameter because it
#     appears less uncertain (i.e., more consistent across microsomal
#     and hepatocyte data).

# Central estimate of VMax is 342, 76.2, and 32.3 (micromol/min/
#     kg liver) for mouse, rat, human. Converting to /hr by
#     * (60 min/hr * 0.1314 mg/micromol) gives
#     2700, 600, and 255 mg/hr/kg liver
# Observed variability of about 2-fold GSD. Assume 2-fold GSD for
#     both uncertainty and variability
    VMax = exp(lnISOx) * VLiv*exp(lnVMaxC)* # apply interstrain
scaling

```

```

(Species == 3 ? 2700. : (Species == 2 ? 600. : 255.));

# For mouse and rat central estimates for KM are 0.068~1.088 and
# 0.039~0.679 mmol/l in blood, depending on the scaling
# method used. Taking the geometric mean, and converting
# to mg/l by 131.4 mg/mmol gives 36. and 21. mg/l in blood.
# For human, central estimate
# for Cl are 0.306~3.95 l/min/kg liver. Taking the geometric
# mean and converting to /hr gives a central estimate of
# 66. l/hr/kg.
# KM is then derived from  $KM = V_{Max}/(Cl * V_{liv})$  (central estimate
# of
# Note uncertainty due to scaling is about 4-fold.
# Variability is about 3-fold in mice, 1.3-fold in rats, and
# 2- to 4- fold in humans (depending on scaling).
KM = (Species == 3 ? 36.*exp(lnKMC) : (Species == 2 ?
21.*exp(lnKMC) : VMax/(VLiv*66.*exp(lnClC))));

# Oxidative metabolism splits
# Fractional split of TCE to DCA
# exp(lnFracOtherC) = ratio of DCA to non-DCA
# Diffuse prior distribution: loguniform 1e-4 to 1e2
FracOther = exp(lnISDCA) * exp(lnFracOtherC)/(1+exp(lnFracOtherC));
# apply interstrain scaling
# Fractional split of TCE to TCA
# exp(lnFracTCAC) = ratio of TCA to TCOH
# TCA/TCOH = 0.1 from Lipscomb et al. 1998 using fresh hepatocytes,
# but TCA/TCOH ~ 1 from Bronley-DeLancey et al 2006
# GM = 0.32, GSD = 3.2
FracTCA = 0.32*exp(lnISTCA+lnFracTCAC)*(1-FracOther)/
(1+0.32*exp(lnISTCA+lnFracTCAC));
# apply interstrain scaling

# TCE GSH Metabolism Constants
# Human in vitro data from Lash et al. 1999, define human priors.
#
# VMax (nmol/min/ KM (mM) CLeff (ml/min/
# g tissue) g tissue)
#
# -----
# [high affinity pathway only] [total]
# Human liver cytosol: ~423 0.0055~0.023 21.2~87.0
# Human liver cytosol+ ~211 -- --
# microsomes
# [total] [total] [total]
# Human hepatocytes* 12~30** 0.012~0.039*** 0.2~0.5****
# Human kidney cytosol: 81 0.0164~0.0263 3.08~4.93
# * estimated visually from Fig 1, Lash et al. 1999
# ** Fig 1A, data from 50~500 ppm headspace at 60 min
# and Fig 1B, data at 100~5000 ppm in headspace for 120 min
# *** Fig 1B, 30~100 ppm headspace, converted to blood concentration
# using blood:air PC of 9.5
# **** Fig 1A, data at 50 ppm headspace at 120 min and Fig 1B, data
at
# 25 and 50 ppm headspace at 120 min.
# Overall, human liver hepatocytes are probably most like the

```

```

# intact liver (e.g., accounting for the competition between
# GSH conjugation and oxidation). So central estimates based
# on those: CLeff ~ 0.32 ml/min/g tissue, KM ~ 0.022 mM in blood.
# CLeff converted to 19 l/hr/kg; KM converted to 2.9 mg/l in blood
# However, uncertainty in CLeff is large (values in cytosol
# ~100-fold larger). Moreover, Green et al. 1997 reported
# DCVG formation in cytosol that was ~30,000-fold smaller
# than Lash et al. (1998) in cytosol, which would be a VMax
# ~300-fold smaller than Lash et al. (1998) in hepatocytes.
# Uncertainty in KM appears smaller (~4-fold)
# CLC: GM = 19., GSD = 100; KM: GM = 2.9., GSD = 4.
# In addition, at a single concentration, the variability
# in human liver cytosol samples had a GSD=1.3.
# For the human kidney, the kidney cytosol values are used, with the same
# uncertainty as for the liver. Note that the DCVG formation rates
# in rat kidney cortical cells and rat cytosol are quite similar
# (see below).
# CLC: GM = 230., GSD = 100; KM: GM = 2.7., GSD = 4.
# Rat and mouse in vitro data from Lash et al. 1995,1998 define rat and
mouse
# priors. However, rats and mice are only assayed at 1 and 2 mM
# providing only a bound on VMax and very little data on KM.
#
# Rate at 2 mM      Equivalent CLeff
#
#                   blood conc. at 2 mM
#                   (nmol/min/ (mM)      (ml/min/
#                   g tissue)          g tissue)
#
# -----
# Rat      hepatocytes:      4.4~16          2.0          0.0022~0.0079
# liver cytosol:      8.0~12          1.7~2.0          0.0040~0.0072
# kidney cells:      0.79~1.1      2.2          0.00036~0.00049
# kidney cytosol:      0.53~0.75      1.1~2.0          0.00027~0.00068
# Mouse liver cytosol:      36~40          1.1~2.0          0.018~0.036
# kidney cytosol:      6.2~9.3          0.91~2.0          0.0031~0.0102
#
# In most cases, rates were increased over the same sex/species at 1 mM,
# indicating VMax has not yet been reached. The values between cells
# and cytosol are more much consistent that in the human data.
# These data therefore put a lower bound on VMax and a lower bound
# on CLC. To account for in vitro-in vivo uncertainty, the lower
# bound of the prior distribution is set 100-fold below the central
# estimate of the measurements here. In addition, Green et al.
# (1997) found values 100-fold smaller than Lash et al. 1995, 1998.
# Therefore diffuse prior distributions set to 1e-2~1e4.
# Rat liver: Bound on VMax of 4.4~16, with GM of 8.4. Converting to
# mg/hr/kg tissue (* 131.4 ng/nmol * 60 min/hr * 1e3 g/kg / 1e6
mg/ng)
# gives a central estimate of 66. mg/hr/kg tissue. Bound on CL of
# 0.0022~0.0079, with GM of 0.0042. Converting to l/hr/kg tissue
# (* 60 min/hr) gives 0.25 l/hr/kg tissue.
# Rat kidney: Bound on VMax of 0.53~1.1, with GM of 0.76. Converting
# to mg/hr/kg tissue gives a central estimate of 6.0 mg/hr/kg.
# Bound on CL of 0.00027~0.00068, with GM of 0.00043. Converting
# to l/hr/kg tissue gives 0.026 l/hr/kg tissue.
# Mouse liver: Bound on VMax of 36~40, with GM of 38. Converting

```

```

# to mg/hr/kg tissue gives a central estimate of 300. mg/hr/kg.
# Bound on CL of 0.018~0.036, with GM of 0.025. Converting
# to l/hr/kg tissue gives 1.53 l/hr/kg tissue.
# Mouse kidney: Bound on VMax of 6.2~9.3, with GM of 7.6. Converting
# to mg/hr/kg tissue gives a central estimate of 60. mg/hr/kg.
# Bound on CL of 0.0031~0.0102, with GM of 0.0056. Converting
# to l/hr/kg tissue gives 0.34 l/hr/kg tissue.

# apply interstrain scaling to both liver and kidney
VMaxDCVG = exp(lnISConj) * VLiv*(Species == 3 ?
(300.*exp(lnVMaxDCVGC)) : (Species == 2 ? (66.*exp(lnVMaxDCVGC)) :
(2.9*19.*exp(lnClDCVGC+lnKMDCVGC))));
KMDCVGC = (Species == 3 ? (VMaxDCVG/(VLiv*1.53*exp(lnClDCVGC))) :
(Species == 2 ? (VMaxDCVG/(VLiv*0.25*exp(lnClDCVGC))) :
2.9*exp(lnKMDCVGC)));
ClDCVG = VMaxDCVG/KMDCVGC;#(vrisk)
VMaxKidDCVG = exp(lnISConj) * VKid*(Species == 3 ?
(60.*exp(lnVMaxKidDCVGC)) : (Species == 2 ? (6.0*exp(lnVMaxKidDCVGC)) :
(2.7*230.*exp(lnClKidDCVGC+lnKMKidDCVGC))));
KMKidDCVG = (Species == 3 ?
(VMaxKidDCVG/(VKid*0.34*exp(lnClKidDCVGC))) : (Species == 2 ?
(VMaxKidDCVG/(VKid*0.026*exp(lnClKidDCVGC))) : 2.7*exp(lnKMKidDCVGC)));

# TCE Metabolism Constants for Chloral Kinetics in Lung (mg/hr)
#(v1.2) Scaled to liver VMax using data from Green et al. (1997)
# in microsomal preparations (nmol/min/mg protein) at ~1 mM.
# For humans, used detection limit of 0.03
# Additional scaling by lung/liver weight ratio
# from Brown et al. Table 21 (mouse and rat) or
# ICRP Pub 89 Table 2.8 (Human female and male)
# Uncertainty ~ 3-fold truncated at 3 GSD
VMaxClara = exp(lnVMaxLungLivC) * VMax *
(Species == 3 ? (1.03/1.87*0.7/5.5):(Species == 2 ?
(0.08/0.82*0.5/3.4):(0.03/0.33*(Male == 0 ? (0.42/1.4) : (0.5/1.8)))));
KMClara = exp(lnKMClara);
#(v1.2) VMaxClara = KMClara*exp(lnClClaraC)*BW75;
#(v1.2) VMaxClear = exp(lnVMaxClearC) * BW75;
#(v1.2) KMClear = exp(lnKMClear);
#(v1.2) Fraction of Respiratory Metabolism that goes to system
circulation
# (translocated to the liver)
FracLungSys = exp(lnFracLungSysC)/(1 + exp(lnFracLungSysC));

# TCOH Metabolism Constants (mg/hr)
# No in vitro data. So use diffuse priors of
# 1e-4 to 1e4 mg/hr/kg^0.75 for VMax
# (4e-5 to 4000 mg/hr for rat),
# 1e-4 to 1e4 mg/l for KM,
# and 1e-5 to 1e3 l/hr/kg^0.75 for Cl
# (2e-4 to 2.4e4 l/hr for human)
VMaxTCOH = BW75*
(Species == 3 ? (exp(lnVMaxTCOHC)) : (Species == 2 ?
(exp(lnVMaxTCOHC)) : (exp(lnClTCOHC+lnKMTCOH))));
KMTCOH = exp(lnKMTCOH);

```

```

VMaxGluc = BW75*
  (Species == 3 ? (exp(lnVMaxGlucC)) : (Species == 2 ?
(exp(lnVMaxGlucC)) : (exp(lnClGlucC+lnKMGluc)))));
KMGluc = exp(lnKMGluc);
# No in vitro data. So use diffuse priors of
# 1e-5 to 1e3 kg^0.25/hr (3.5e-6/hr to 3.5e2/hr for human)
kMetTCOH = exp(lnkMetTCOHC) / BW25;

# TCA kinetic parameters
# Central estimate based on GFR clearance per unit body weight
# 10.0, 8.7, 1.8 ml/min/kg for mouse, rat, human
# (= 0.6, 0.522, 0.108 l/hr/kg) from Lin 1995.
# = CL_GFR / BW (BW=0.02 for mouse, 0.265 for rat, 70 for
human)
# kUrn = CL_GFR / VPlas
# Diffuse prior with uncertainty of up,down 100-fold
# add interstrain variability
kUrnTCA = exp(lnISkTCA) * exp(lnkUrnTCAC) * BW / VPlas *
  (Species == 3 ? 0.6 : (Species == 2 ? 0.522 : 0.108));
# No in vitro data. So use diffuse priors of
# 1e-4 to 1e2 /hr/kg^0.25 (0.3/hr to 35/hr for human)
kMetTCA = exp(lnISkTCA) * exp(lnkMetTCAC) / BW25;

# TCOG kinetic parameters
# No in vitro data. So use diffuse priors of
# 1e-4 to 1e2 /hr/kg^0.25 (0.3/hr to 35/hr for human)
kBile = exp(lnkBileC) / BW25;
kEHR = exp(lnkEHRC) / BW25;
# Central estimate based on GFR clearance per unit body weight
# 10.0, 8.7, 1.8 ml/min/kg for mouse, rat, human
# (= 0.6, 0.522, 0.108 l/hr/kg) from Lin 1995.
# = CL_GFR / BW (BW=0.02 for mouse, 0.265 for rat, 70 for
human)
# kUrn = CL_GFR / VBld
# Diffuse prior with Uncertainty of up,down 1000-fold
kUrnTCOG = exp(lnkUrnTCOGC) * BW / (VBodTCOH * PBodTCOG) *
  (Species == 3 ? 0.6 : (Species == 2 ? 0.522 : 0.108));

# DCVG Kinetics (/hr)
# Fraction of renal TCE GSH conj. "directly" to DCVC via "first
pass"
# exp(lnFracOtherCC) = ratio of direct/non-direct
# Diffuse prior distribution: loguniform 1e-3 to 1e3
#(v1.2.3) FIXED
FracKidDCVC = exp(lnFracKidDCVCC)/(1 + exp(lnFracKidDCVCC));
# No in vitro data. So use diffuse priors of
# 1e-4 to 1e2 /hr/kg^0.25 (0.3/hr to 35/hr for human)
# add interstrain variability
kDCVG = exp(lnISkDCVG) * exp(lnkDCVGC) / BW25;

# DCVC Kinetics (/hr)#(v2.0)
# No in vitro data. So use diffuse priors of
# 1e-4 to 1e2 /hr/kg^0.25 (0.3/hr to 35/hr for human)
# add interstrain variability

```

```

kElimDCVC = exp(lnISkDCVC) * exp(lnkElimDCVCC) / BW25;#(v2.0)

# DCA Kinetics (/hr)#(v2.0)
  # add interstrain variability
kClearDCA = exp(lnISkDCA) * exp(lnkClearDCAC) / BW25;#(v2.0)
kDCAcen_per = exp(lnkDCAcen_perC) / BW25;#(v2.0)
kDCAper_cen = exp(lnkDCAper_cenC) / BW25;#(v2.0)

# CC data initialization
Rodents = (CC > 0 ? NRodents : 0.0); # Closed chamber simulation
VCh = (CC > 0 ? VChC - (Rodents * BW) : 1.0);
  # Calculate net chamber volume
kLoss = (CC > 0 ? exp(lnkLossC) : 0.0);

#*****
#*****
#***          State Variable Initialization and Scaling
#***
#*****
#*****
# NOTE: All State Variables are set to 0 initially, unless re-initialized
here

      Ach = (CC * VCh * MWTCE) / 24450.0;      # Initial amount in chamber

#printf("ClC=%lf\n KM=%lf\n kDCVGC=%lf\n FracTCA=%lf\n ClClaraC=%lf\n
KMClara=%lf\n kDissoc=%lf\n BMax=%lf\n ClTCOHC=%lf\n KMTCOH=%lf\n
ClGlucC=%lf\n KMGluc=%lf\n kElimDCVCC=%lf\n kTSD=%lf\n kAD=%lf\n
kBileC=%lf\n kEHRC=%lf\n kUrnTCAC=%lf\n kUrnTCOGC=%lf\n TCAPlas=%lf\n
VPR=%lf\n lnQCC=%lf\n QFatC=%lf\n QGutC=%lf\n QLivC=%lf\n QSlwC=%lf\n
QTBC=%lf\n VFatBldC=%lf\n VFatC=%lf\n VGutC=%lf\n VLivC=%lf\n VRapC=%lf\n
VTBC=%lf\n VBldC=%lf\n FracPlas=%lf\n VBodC=%lf\n VDTCOHC=%lf\n PB=%lf\n
PFat=%lf\n PGut=%lf\n PLiv=%lf\n PRap=%lf\n PSlw=%lf\n PTB=%lf\n
PAFatC1=%lf\n PAFatC2=%lf\n PBodTCA=%lf\n PLivTCA=%lf\n", #(v2.0)
#ClC, KM, kDCVGC, FracTCA, ClClaraC, KMClara, kDissoc, BMax, ClTCOHC,
KMTCOH, ClGlucC, KMGluc, kElimDCVCC, kTSD, kAD, kBileC, kEHRC, kUrnTCAC,
kUrnTCOGC, TCAPlas, VPR, lnQCC, QFatC, QGutC, QLivC, QSlwC, QTBC,
VFatBldC, VFatC, VGutC, VLivC, VRapC, VTBC, VBldC, FracPlas, VBodC,
VDTCOHC, PB, PFat, PGut, PLiv, PRap, PSlw, PTB, PAFatC1, PAFatC2,
PBodTCA, PLivTCA);#(v2.0)
};
##### End of Initialization #####

Dynamics{

# Some test print statements used to test and debug the translation.
# printf("\nt=%lf\tCART=%lf\tCVRap=%lf\tQRap=%lf\tPRap=%lf\tVRap=%lf\n",
*(pdTime), CART, CVRap, QRap, PRap, VRap);
# printf("QFat=%lf\tQGutLiv=%lf\tQSlw=%lf\tQRap=%lf\tQTB=%lf\n", QFat,
QGutLiv, QSlw, QRap, QTB);
# printf("CVTB=%lf\n", rgModelVars[ID_CVTB]);
# printf("QP=%lf\tQC=%lf\tPB=%lf\n", QP, QC, PB);
# printf("t=%lf\tCART=%lf\tCVen=%lf\tCVTB=%lf\n", *(pdTime), CART,
rgModelVars[ID_CVen], rgModelVars[ID_CVTB]);

```

```

# printf("QBal = %lf\t", QFat+QGutLiv+QSlw+QRap+QTB - QC);
# printf("VTot = %lf\tBW=%lf\n", VFat+VFatBld+VGut+VLiv+VSlw+VRap+VTB,
BW);

#*****
#*****
#***          Dynamic physiological parameter scaling
#**
#*****
# State Variables with dynamics:
#   none
# Input Variables:
#   QPmeas
# Other State Variables and Global Parameters:
#   QC
#   VPR
#   DResptmp
#   QPsamp
#   QFatCtmp
#   QGutCtmp
#   QLivCtmp
#   QSlwCtmp
#(v1.2)   QTBtmp
#   QKidCtmp
#   FracPlas
# Temporary variables used:
#   none
# Temporary variables assigned:
#   QP
#   DResp
#   QCnow
#   QFat
#   QGut
#   QLiv
#   QSlw
#(v1.2)   QTB
#   QKid
#   QGutLiv
#   QRap
#   QCPlas
#   QBodPlas
#   QGutLivPlas
# Notes:
#*****
#*****

# QP uses QPmeas if value is > 0, otherwise uses sampled value
  QP = (QPmeas > 0 ? QPmeas : QPsamp);
#(v1.2) Scale diffusion flow rate
  DResp = DResptmp * QP;

# QCnow uses QPmeas/VPR if QPmeas > 0, otherwise uses sampled value

```

```

QCnow = (QPmeas > 0 ? QPmeas/VPR : QC);

# These done here in dynamics in case QCnow changes
# Blood Flows to Tissues (L/hr)
  QFat = (QFatCtmp) * QCnow; #
  QGut = (QGutCtmp) * QCnow; #
  QLiv = (QLivCtmp) * QCnow; #
  QSlw = (QSlwCtmp) * QCnow; #
#(v1.2)      QTB = (QTBctmp) * QCnow; #

  QKid = (QKidCtmp) * QCnow; #
  QGutLiv = QGut + QLiv; #
#(v1.2)      QRap = QCnow - QFat - QGut - QLiv - QSlw - QTB - QKid;
  QRap = QCnow - QFat - QGut - QLiv - QSlw - QKid; #(v1.2)
  ##          #(v1b)#(v1c) don't subtract off TB
  QBod = QCnow - QGutLiv;

  QFatSC = QFat/QCnow; # (vrisk3) #Scaled fat blood flow
  QGutSC = QGut/QCnow; # (vrisk3) #Scaled gut blood flow
  QLivSC = QLiv/QCnow; # (vrisk3) #Scaled liver blood flow
  QSlwSC = QSlw/QCnow; # (vrisk3) #Scaled slowly perfused blood flow
  QRapSC = QRap/QCnow; # (vrisk3) #Scaled rapidly perfused blood flow
  QKidSC = QKid/QCnow; # (vrisk3) #Scaled kidney blood flow

# Plasma Flows to Tissues (L/hr)
  QCPlas = FracPlas * QCnow; #
  QBodPlas = FracPlas * QBod; #
  QGutLivPlas = FracPlas * QGutLiv; #

  VFatSC=VFat/BW; # (vrisk3) #Fat fractional compartment volume
  VGutSC=VGut/BW; # (vrisk3) #Gut fractional compartment volume
  VLivSC=VLiv/BW; # (vrisk3) #Liver fractional compartment volume
  VRapSC=VRap/BW; # (vrisk3) #Rapidly perfused fractional compartment
volume
  VRespLumSC=VRespLum/BW; # (vrisk3) # Fractional volume of respiratory
lumen
  VRespEffSC=VRespEff/BW; # (vrisk3) #Effective fractional volume of
respiratory tissue
  VKidSC=VKid/BW; # (vrisk3) #Kidney fractional compartment volume
  VBldSC=VBld/BW; # (vrisk3) #Blood fractional compartment volume
  VSlwSC=VSlw/BW; # (vrisk3) #Slowly perfused fractional compartment
volume
  VPlasSC=VPlas/BW; # (vrisk3) #Plasma fractional compartment volume
  VBodSC=VBod/BW; # (vrisk3) #TCA Body fractional compartment volume [not
incl. blood+liver]
  VBodTCOHSC=VBodTCOH/BW; # (vrisk3) #TCOH/G Body fractional compartment
volume [not incl. liver]

#*****
*****
#***          Exposure and Absorption calculations
***

```

```

#*****
*****
# State Variables with dynamics:
#   AStom
#   ADuod
#   AStomTCA
#   AStomTCOH
# Input Variables:
#   IVDose
#   PDose
#   Drink
#   Conc
#   IVDoseTCA
#   PODoseTCA
#   IVDoseTCOH
#   PODoseTCOH
# Other State Variables and Global Parameters:
#   ACh
#   CC
#   VCh
#   MWTCE
#   BW
#   TChng
#   kAS
#   kTSD
#   kAD
#   kTD
#   kASTCA
#   kASTCOH
# Temporary variables used:
#   none
# Temporary variables assigned:
#   kIV - rate into CVen
#   kIA - rate into CArt
#   kPV - rate into portal vein
#   kStom - rate into stomach (v1.2.1)
#   kDrink - incorporated into RAO
#   RAO - rate into gut (oral absorption - both gavage and drinking
water)
#   CInh - inhalation exposure concentration
#   kIVTCA - rate into blood
#   kStomTCA - rate into stomach (v1.2.1)
#   kPOTCA - rate into liver (oral absorption)
#   kIVTCOH - rate into blood
#   kStomTCOH - rate into stomach (v1.2.1)
#   kPOTCOH - rate into liver (oral absorption)
# Notes:
# For oral dosing, using "Spikes" for instantaneous inputs
# Inhalation Concentration (mg/L)
#   CInh uses Conc when open chamber (CC=0) and
#   ACh/VCh when closed chamber CC>0.
#*****
*****

```

```

#### TCE DOSING
## IV route
  kIV = (IVDose * BW) / TChng;# IV infusion rate (mg/hr)
        # (IVDose constant for duration TChng)
  kIA = (IADose * BW) / TChng; # IA infusion rate (mg/hr) (vlf)
  kPV = (PVDose * BW) / TChng; # PV infusion rate (mg/hr) (vlf)
  kStom = (PDose * BW) / TChng;# PO dose rate (into stomach) (mg/hr)
(v1.2.1)

## Oral route
# Amount of TCE in stomach -- for oral dosing only (mg)
#(v1.2.1) dt(AStom) = PDose * BW - AStom * (kAS + kTSD);
  dt(AStom) = kStom - AStom * (kAS + kTSD);

# Amount of TCE in duodenum -- for oral dosing only (mg)
  dt(ADuod) = (kTSD * AStom) - (kAD + kTD) * ADuod;
# Rate of absorption from drinking water
  kDrink = (Drink * BW) / 24.0; #Ingestion rate via drinking water
(mg/hr)
# Total rate of absorption including gavage and drinking water
  RAO = kDrink + (kAS * AStom) + (kAD * ADuod);
## Inhalation route
  CInh = (CC > 0 ? ACh/VCh : Conc*MWTCE/24450.0); # in mg/l

#### TCA Dosing
  kIVTCA = (IVDoseTCA * BW) / TChng; # TCA IV infusion rate (mg/hr)
  kStomTCA = TCABgd * BW / 24 + #(v2.0) TCA background in mg/kg/d
  (PODoseTCA * BW) / TChng; # TCA PO dose rate into stomach
#(v1.2.1) dt(AStomTCA) = PODoseTCA * BW - AStomTCA * kASTCA;
  dt(AStomTCA) = kStomTCA - AStomTCA * kASTCA;
  kPOTCA = AStomTCA * kASTCA; # TCA oral absorption rate (mg/hr)

#### TCOH Dosing
  kIVTCOH = (IVDoseTCOH * BW) / TChng;#TCOH IV infusion rate (mg/hr)
  kStomTCOH = (PODoseTCOH * BW) / TChng; # TCOH PO dose rate into
stomach
#(v1.2.1.) dt(AStomTCOH) = PODoseTCOH * BW - AStomTCOH * kASTCOH;
  dt(AStomTCOH) = kStomTCOH - AStomTCOH * kASTCOH;
  kPOTCOH = AStomTCOH * kASTCOH;# TCOH oral absorption rate (mg/hr)

*****
*****
***
TCE Model
***
*****
*****
# State Variables with dynamics:
# ARap, # Amount in rapidly perfused tissues
# ASlw, # Amount in slowly perfused tissues
# AFat, # Amount in fat
# AGut, # Amount in gut
# ALiv, # Amount in liver
#(v1.2) ATB, # Amount in TB -- candidate to remove and put in
Rap

```

```

#   AInhResp,
#   AResp,
#   AExhResp,
#   AKid,           # Amount in Kidney -- currently in Rap tissue
#   ABld,           # Amount in Blood -- currently in Rap tissue
#   ACh,           # Amount of TCE in closed chamber
# Input Variables:
#   none
# Other State Variables and Global Parameters:
#   VRap
#   PRap
#   VSlw
#   PSlw
#   VFat
#   PFat
#   VGut
#   PGut
#   VLiv
#   PLiv
# (v1.2)   VTB
# (v1.2)   PTB
#   VRespLum
#   VRespEff
#   FracLungSys
#   VKid
#   PKid
#   VBld
#   VMaxClara
#   KMClara
#   PB
#   Rodents
#   VCh
#   kLoss
#   VMax
#   KM
#   VMaxDCVG
#   KMDCVG
#   VMaxKidDCVG
#   KMKidDCVG
# Temporary variables used:
#   QM
#   QFat
#   QGutLiv
#   QSlw
#   QRap
# (v1.2)   QTB
#   QKid
#   kIV
#   QCnow
#   CInh
#   QP
#   RAO
# Temporary variables assigned:
#   QM

```

```

#   CRap
#   CSlw
#   CFat
#   CGut
#   CLiv
#(v1.2)   CTB
#   CinhResp
#   CResp
#   CExhResp
#   ExhFactor
#   CMixExh
#   CKid
#   CVRap
#   CVSlw
#   CVFat
#   CVGut
#   CVLiv
#   CVTB
#   CVKid
#   CVen
#   RAMetLng
#   CArt_tmp
#   CArt
#   CALv
#   RAMetLiv1
#   RAMetLiv2
#   RAMetKid
# Notes:
#*****
#
#(v1.2)   ATB = (VMaxClara > RTB) ? (RTB*KMClara*VTB*PTB/(VMaxClara -
RTB)) : 0; # (v1j)

#***Blood
(venous)*****
# Tissue Concentrations (mg/L)
   CRap = ARap/VRap;
   CSlw = ASlw/VSlw;
   CFat = AFat/VFat;
   CGut = AGut/VGut;
   CLiv = ALiv/VLiv;
#(v1.2)   CTB = (ATB<0 ? 0 : ATB/VTB); # Comment out for #(v1b)#(v1c)
   CKid = AKid/VKid;
# Venous Concentrations (mg/L)
   CVRap = CRap / PRap;
   CVSlw = CSlw / PSlw;
   CVFat = CFat / PFat;
   CVGut = CGut / PGut;
   CVLiv = CLiv / PLiv;
#(v1.2)   CVTB = CTB / PTB; # Comment out for #(v1b)#(v1c)
   CVKid = CKid / PKid;
# Concentration of TCE in mixed venous blood (mg/L)
   CVen = ABld/VBld; # Comment out for #(v1a)#(v1c)

```

```

        ##      CVen = (QFat*CVFat + QGutLiv*CVLiv + QSlw*CVSlw +
#(v1a)#(v1c)
        ##          QRap*CVRap + QTB*CVTB + QKid*CVKid + kIV) / QCnow;
#(v1a)
        ##          QRap*CVRap + QKid*CVKid + kIV) / QCnow; #(v1c)
# Dynamics for blood
        dt(ABld) = (QFat*CVFat + QGutLiv*CVLiv + QSlw*CVSlw + # Comment out
for #(v1a)#(v1c)
        QRap*CVRap + QKid*CVKid + kIV) - CVen * QCnow; #(v1.2)(v1b)
#(v1.2)          QRap*CVRap + QTB*CVTB + QKid*CVKid + kIV) - CVen *
QCnow;# Comment out for #(v1a)#(v1c)

#****Gas exchange
*****
# Concentration in arterial blood leaving lung (mg/L) #(v1f)
#(v1.2)      Cart_tmp = ((QCnow * CVen) + (QP * CInh)) / (QCnow + (QP /
PB));

#****Respiratory
Metabolism*****
#(v1.2)
        QM = QP/0.7; # Minute-volume
        CInhResp = AInhResp/VRespLum;
        CResp = AResp/VRespEff;
        CExhResp = AExhResp/VRespLum;
        dt(AInhResp) = (QM*CInh + DResp*(CResp-CInhResp) - QM*CInhResp);
        RAMetLng = VMaxClara * CResp/(KMClara + CResp);
        dt(AResp) = (DResp*(CInhResp + CExhResp - 2*CResp) - RAMetLng);
        Cart_tmp = (QCnow*CVen + QP*CInhResp)/(QCnow + (QP/PB));
        dt(AExhResp) = (QM*(CInhResp-CExhResp) + QP*(Cart_tmp/PB-CInhResp) +
                DResp*(CResp-CExhResp));
        CMixExh = (CExhResp > 0 ? CExhResp : 1e-15); #(v1.2) mixed exhaled
breath

# Concentration in alveolar air (mg/L) #(v1f)
#(v1.2)      CALv = CART_tmp / PB;
        #(v1.2) Correction factor for exhaled air to account for
# absorption/desorption/metabolism in respiratory tissue
# = 1 if DResp = 0
        ExhFactor_den = (QP * CART_tmp / PB + (QM-QP)*CInhResp);
        ExhFactor = (ExhFactor_den > 0) ? (
                QM * CMixExh / ExhFactor_den) : 1;
        #(v1.2) End-exhaled breath (corrected for absorption/
# desorption/metabolism in respiratory tissue)
        CALv = CART_tmp / PB * ExhFactor;
# Concentration in arterial blood entering circulation (mg/L) #(v1f)
        CART = CART_tmp + kIA/QCnow; # add inter-arterial dose

#****Other dynamics for inhalation/exhalation
*****
# Dynamics for amount of TCE in closed chamber
#(v1.2)      dt(ACh) = (Rodents * (QP * CALv - QP * ACh/VCh)) - (kLoss *
ACh);
        dt(ACh) = (Rodents * (QM * CMixExh - QM * ACh/VCh)) - (kLoss * ACh);

```

```

# (v1.2)
#**** TB region
*****
# Amount metabolized in the tracheo-bronchial region (mg)
#(vlj)      RAMetLng = (VMaxClara * CVTB) / (KMClara + CVTB); ## comment
out for #(vlb)#(v1c)
#(v1.2)      RAMetLng = RTB; #(vlj)
# Amount of TCE in the tracheo-bronchial region (mg)
#(vlj)      dt(ATB) = QTB*(CArt - CVTB) - RAMetLng; ## comment out for
#(vlb)#(v1c)
#(v1.2)      ZTB = (VMaxClara > RTB) ? (VMaxClara - RTB) : 0;
#(v1.2)      dt(RTB) = ZTB*(QTB*CArt*ZTB - RTB*(KMClara*QTB + ZTB))/
#(vlj)
#(v1.2)      (VMaxClara*KMClara*PTB*VTB); #(vlj)
# Venous blood draining TB (vlb) (v1c)
##      a = (VMaxClara/QTB + KMClara - CArt)/2;#(vlb)#(v1c)
##      b = CArt*KMClara;#(vlb)#(v1c)
##      CVTB = (b < 0.01*a*a ? b/2.0/a : sqrt(a*a+b)-a);#(vlb)#(v1c)
# Amount of TCE in the tracheo-bronchial region (mg) (vlb)#(v1c)
##      CTB = CVTB * PTB;#(vlb)#(v1c)
# Amount metabolized in the tracheo-bronchial region (mg) (vlb)#(v1c)
##      a = (VMaxClara + QTB*(KMClara + CArt))/2;#(vlb)#(v1c)
##      b = CArt*QTB*VMaxClara;#(vlb)#(v1c)
##      RAMetLng = (b < 0.01*a*a ? b/2.0/a : a-sqrt(a*a-b));#(vlb)#(v1c)

#**** Non-metabolizing tissues
*****
# Amount of TCE in rapidly perfused tissues (mg)
      dt(ARap) = QRap * (CArt - CVRap); ##      - RAMetLng; #(vlb)#(v1c)
# Amount of TCE in slowly perfused tissues
      dt(ASlw) = QSlw * (CArt - CVSlw);
# Amount of TCE in fat tissue (mg)
      dt(AFat) = QFat*(CArt - CVFat);
# Amount of TCE in gut compartment (mg)
      dt(AGut) = (QGut * (CArt - CVGut)) + RAO;

#**** Liver
*****
# Rate of TCE oxidation by P450 to TCA, TCOH, and other (DCA) in liver
(mg/hr)
      RAMetLiv1 = (VMax * CVLiv) / (KM + CVLiv);
# Rate of TCE metabolized to DCVG in liver (mg)
      RAMetLiv2 = (VMaxDCVG * CVLiv) / (KMDCVG + CVLiv);
# Dynamics for amount of TCE in liver (mg)
      dt(ALiv) = (QLiv * (CArt - CVLiv)) + (QGut * (CVGut - CVLiv))
      - RAMetLiv1 - RAMetLiv2 + kPV; # add PV dose #(v1f)

#**** Kidney
*****
# Rate of TCE metabolized to DCVG in kidney (mg) #
      RAMetKid = (VMaxKidDCVG * CVKid) / (KMKidDCVG + CVKid);
# Amount of TCE in kidney compartment (mg)
      dt(AKid) = (QKid * (CArt - CVKid)) - RAMetKid;

```

```

#*****
#*****
#***          TCOH Sub-model
#**
#*****
# State Variables with dynamics:
#   ABodTCOH
#   ALivTCOH
# Input Variables:
#   none
# Other State Variables and Global Parameters:
#   ABileTCOG
#   kEHR
#   VBodTCOH
#   PBodTCOH
#   VLiv
#   PLivTCOH
#   VMaxTCOH
#   KMTCOH
#   VMaxGluc
#   KMGluc
#   kMetTCOH - hepatic metabolism of TCOH (e.g., to DCA)
#   FracOther
#   FracTCA
#   StochTCOHTCE
#   StochTCOHGluc
#   FracLungSys
# Temporary variables used:
#   QBod
#   QGutLiv
#   QCnow
#   kPOTCOH
#   RAMetLiv1
#   RAMetLng
# Temporary variables assigned:
#   CVBodTCOH
#   CVLivTCOH
#   CTCOH
#   RAMetTCOHTCA
#   RAMetTCOHGluc
#   RAMetTCOH
#   RAREcircTCOG
# Notes:
#*****
#*****
#*** Blood (venous=arterial)
#*****
# Venous Concentrations (mg/L)
#   CVBodTCOH = ABodTCOH / VBodTCOH / PBodTCOH;
#   CVLivTCOH = ALivTCOH / VLiv / PLivTCOH;
#   CTCOH = (QBod * CVBodTCOH + QGutLiv * CVLivTCOH + kIVTCOH)/QCnow;

```

```

#**** Body
*****
# Amount of TCOH in body
  dt(ABodTCOH) = QBod * (CTCOH - CVBodTCOH);

#**** Liver
*****

# Rate of oxidation of TCOH to TCA (mg/hr)
  RAMetTCOHTCA = (VMaxTCOH * CVLivTCOH) / (KMTCOH + CVLivTCOH);
# Amount of glucuronidation to TCOG (mg/hr)
  RAMetTCOHGluc = (VMaxGluc * CVLivTCOH) / (KMGluc + CVLivTCOH);
# Amount of TCOH metabolized to other (e.g., DCA)
  RAMetTCOH = kMetTCOH * ALivTCOH;
# Amount of TCOH-Gluc recirculated (mg)
  RAREcircTCOG = kEHR * ABileTCOG;
# Amount of TCOH in liver (mg)
  dt(ALivTCOH) = kPOTCOH + QGutLiv * (CTCOH - CVLivTCOH)
    - RAMetTCOH - RAMetTCOHTCA - RAMetTCOHGluc
    + ((1.0 - FracOther - FracTCA) * StochTCOHTCE *
      (RAMetLiv1 + FracLungSys*RAMetLng)) #(v1.2)
    + (StochTCOHGluc * RAREcircTCOG);

#(v2.0)
#*****
#*****
#***          DCA Sub-model
#***
#*****
#*****
# State Variables with dynamics:
#   ADCA
#   ADCaper
# Input Variables:
#   None
# Other State Variables and Global Parameters:
#   FracOther
#   StochDCATCE
#   FracLungSys
#   kClearDCA
#   kDCAcen_per
#   kDCAper_cen
#   VDCA
# Temporary variables used:
#   none
# Temporary variables assigned:
#   none
# Notes:
#
#*****
#*****
# Amount of DCA in central compartment (mg)
  dt(ADCA) = DCABgd * BW / 24 + #(v2.0) DCA background in mg/kg/d
    (FracOther * StochDCATCE *

```

```

        (RAMetLiv1 + FracLungSys*RAMetLng)) - (kClearDCA * ADCA) -
        kDCAcen_per * ADCA + kDCAper_cen * ADCAPER;
# Amount of DCA in peripheral compartment (mg)
    dt(ADCAPER) = kDCAcen_per * ADCA - kDCAper_cen * ADCAPER;
# Concentration of DCA in blood (in mmoles/l)
    CDCAmol = ADCA / MWDCA / VDCA;
*****
*****
***          TCA Sub-model
***
*****
*****
# State Variables with dynamics:
#   APlasTCA # comment out for #(v1h)
#   ABodTCA
#   ALivTCA
#   AUrnTCA
#   AUrnTCA_sat
#   AUrnTCA_collect
# Input Variables:
#   TCAUrnSat
#   UrnMissing
# Other State Variables and Global Parameters:
#   VPlas
#   MWTCa
#   kDissoc
#   BMax
#   kMetTCA -- hepatic metabolism of TCA (e.g., to DCA)
#   VBod
#   PBodTCA
#   PLivTCA
#   kUrnTCA
#   FracTCA
#   StochTCATCE
#   StochTCATCOH
#   FracLungSys
# Temporary variables used:
#   kIVTCA
#   kPOTCA
#   QBodPlas
#   QGutLivPlas
#   QCPlas
#   RAMetLiv1
#   RAMetTCOHTCA
#   RAMetLNg
# Temporary variables assigned:
#   CPlasTCA
#   CPlasTCAMole
#   a, b, c
#   CPlasTCAFreeMole
#   CPlasTCAFree
#   APlasTCAFree
#   CPlasTCABnd
#   CBodTCAFree

```

```

# CLivTCAFree
# CBodTCA
# CLivTCA
# CVBodTCA
# CVLivTCA
# RUrnTCA
# RAMetTCA
# Notes:
#*****
#**** Plasma
#*****
# Concentration of TCA in plasma (umoles/L)
  CPlasTCA = (APlasTCA<1.0e-15 ? 1.0e-15 : APlasTCA/VPlas); # comment
out for #(v1h)
  ## CPlasTCA = (kIVTCA + (QBodPlas*CVBodTCA) +
(QGutLivPlas*CVLivTCA))/QCPlas; #(v1h)
# Concentration of free TCA in plasma in (umoles/L)
  CPlasTCAMole = (CPlasTCA / MWTCA) * 1000.0;
  a = kDissoc+BMax-CPlasTCAMole;
  b = 4.0*kDissoc*CPlasTCAMole;
  c = (b < 0.01*a*a ? b/2.0/a : sqrt(a*a+b)-a);
  CPlasTCAFreeMole = 0.5*c;
# Concentration of free TCA in plasma (mg/L)
  CPlasTCAFree = (CPlasTCAFreeMole * MWTCA) / 1000.0;
  APlasTCAFree = CPlasTCAFree * VPlas;
# Concentration of bound TCA in plasma (mg/L)
  CPlasTCABnd = (CPlasTCA<CPlasTCAFree ? 0 : CPlasTCA-CPlasTCAFree);
# Concentration in body and liver
  CBodTCA = (ABodTCA<0 ? 0 : ABodTCA/VBod);
  CLivTCA = (ALivTCA<1.0e-15 ? 1.0e-15 : ALivTCA/VLiv);
# Total concentration in venous plasma (free+bound)
  CVBodTCAFree = (CBodTCA / PBodTCA); # free in equilibrium
  CVBodTCA = CPlasTCABnd + CVBodTCAFree;
# CVBodTCA = (BMax+kDissoc + CVBodTCAFree)*CVBodTCAFree / #(v1g)
# (kDissoc + CVBodTCAFree); #(v1g) total in equilibrium
  CVLivTCAFree = (CLivTCA / PLivTCA);
  CVLivTCA = CPlasTCABnd + CVLivTCAFree; # free in equilibrium
# CVLivTCA = (BMax+kDissoc + CVLivTCAFree)*CVLivTCAFree / #(v1g)
# (kDissoc + CVLivTCAFree); #(v1g) total in equilibrium
# Rate of urinary excretion of TCA
  RUrnTCA = kUrnTCA * APlasTCAFree;
# Dynamics for amount of total (free+bound) TCA in plasma (mg)
  dt(APlasTCA) = kIVTCA + (QBodPlas*CVBodTCA) + (QGutLivPlas*CVLivTCA)
# comment out for #(v1h)
  - (QCPlas * CPlasTCA) - RUrnTCA; # comment out for
#(v1h)

#**** Body
#*****
# Dynamics for amount of TCA in the body (mg)
  dt(ABodTCA) = QBodPlas * (CPlasTCAFree - CVBodTCAFree);
  ## dt(ABodTCA) = QBodPlas * (CPlasTCAFree - CVBodTCAFree) -
RUrnTCA; #(v1h)

```

```

# dt(ABodTCA) = QBodPlas * (CPlasTCA - CVBodTCA); # (v1g)
## dt(ABodTCA) = QBodPlas * (CPlasTCA - CVBodTCA) - RUrnTCA;
# (v1g)+(v1h)

#**** Liver
*****
# Rate of metabolism of TCA
RAMetTCA = kMetTCA * ALivTCA;
# Dynamics for amount of TCA in the liver (mg)
dt(ALivTCA) = kPOTCA + QGutLivPlas*(CPlasTCAFree - CVLivTCAFree)
- RAMetTCA + (FracTCA * StochTCATCE *
(RAMetLiv1 + FracLungSys*RAMetLng)) # (v1.2)
+ (StochTCATCOH * RAMetTCOHTCA);
# dt(ALivTCA) = kPOTCA + QGutLivPlas*(CPlasTCA - CVLivTCA) # (v1g)
# - RAMetTCA + (FracTCA * StochTCATCE * RAMetLiv1) # (v1g)
# + (StochTCATCOH * RAMetTCOHTCA); # (v1g)

#**** Urine
*****
# Dynamics for amount of TCA in urine (mg)
dt(AUrnTCA) = RUrnTCA;
dt(AUrnTCA_sat) = TCAUrnSat*(1-UrnMissing)* RUrnTCA;
# Saturated, but not missing collection times
dt(AUrnTCA_collect) = (1-TCAUrnSat)*(1-UrnMissing)*RUrnTCA;
# Not saturated and not missing collection times

*****
*****
#*** TCOG Sub-model
***
*****
*****
# State Variables with dynamics:
# ABodTCOG
# ALivTCOG
# ABileTCOG
# AUrnTCOG
# AUrnTCOG_sat
# AUrnTCOG_collect
# Input Variables:
# TCOGUrnSat
# UrnMissing
# Other State Variables and Global Parameters:
# VBodTCOH
# VLiv
# PBodTCOG
# PLivTCOG
# kUrnTCOG
# kBile
# StochGlucTCOH
# Temporary variables used:
# QBod
# QGutLiv
# QCnow

```

```

#   RAMetTCOHGluc
#   RAREcircTCOG
# Temporary variables assigned:
#   CVBodTCOG
#   CVLivTCOG
#   CTCOG
#   RUrnTCOG
#   RBileTCOG
# Notes:
#*****
#**** Blood (venous=arterial)
#*****
# Venous Concentrations (mg/L)
#   CVBodTCOG = ABodTCOG / VBodTCOH / PBodTCOG;
#   CVLivTCOG = ALivTCOG / VLiv / PLivTCOG;
#   CTCOG = (QBod * CVBodTCOG + QGutLiv * CVLivTCOG)/QCnow;
#**** Body
#*****
# Amount of TCOG in body
#   RUrnTCOG = kUrnTCOG * ABodTCOG;
#   dt(ABodTCOG) = QBod * (CTCOG - CVBodTCOG) - RUrnTCOG;

#**** Liver
#*****
# Amount of TCOG in liver (mg)
#   RBileTCOG = kBile * ALivTCOG;
#   dt(ALivTCOG) = QGutLiv * (CTCOG - CVLivTCOG)
#   + (StochGlucTCOH * RAMetTCOHGluc) - RBileTCOG;

#**** Bile
#*****
# Amount of TCOH-Gluc excreted into bile (mg)
#   dt(ABileTCOG) = RBileTCOG - RAREcircTCOG;

#**** Urine
#*****
# Amount of TCOH-Gluc excreted in urine (mg)
#   dt(AUrnTCOG) = RUrnTCOG;
#   dt(AUrnTCOG_sat) = TCOGUrnSat*(1-UrnMissing)*RUrnTCOG;
#   # Saturated, but not missing collection times
#   dt(AUrnTCOG_collect) = (1-TCOGUrnSat)*(1-UrnMissing)*RUrnTCOG;
#   # Not saturated and not missing collection times

#*****
#****
#***                               DCVG Sub-model
#***
#*****
# State Variables with dynamics:
#   ADCVGmol
# Input Variables:
#   none

```

```

# Other State Variables and Global Parameters:
#   kDCVG
#   FracKidDCVC # Fraction of kidney DCVG going to DCVC in first pass
#   VDCVG
# Temporary variables used:
#   RAMetLiv2
#   RAMetKid
# Temporary variables assigned:
#   RAMetDCVGmol
#   CDCVGmol
# Notes:
#   Assume negligible GGT activity in liver as compared to kidney,
#   supported by in vitro data on GGT (even accounting for 5x
#   greater liver mass relative to kidney mass), as well as lack
#   of DCVC detected in blood.
#   Need to account for "first pass" in kidney (TCE->DCVG->DCVC
#   without systemic circulation).
#*****
#*****
# Rate of metabolism of DCVG to DCVC
#   RAMetDCVGmol = kDCVG * ADCVGmol;
# Dynamics for DCVG in blood
#   dt(ADCVGmol) = (RAMetLiv2 + RAMetKid*(1-FracKidDCVC)) / MWTCE
#   - RAMetDCVGmol;
# Concentration of DCVG in blood (in mmoles/l)
#   CDCVGmol = ADCVGmol / VDCVG;

#*****
#*****
#***           DCVC Sub-model
#**
#*****
#*****
# State Variables with dynamics:
#   ADCVC#(v2.0)
# Input Variables:
#   none
# Other State Variables and Global Parameters:
#   MWDCVC
#   FracKidDCVC
#   StochDCVCTCE
#   kElimDCVC#(v2.0)
#   VDCVC#(v2.0)
# Temporary variables used:
#   RAMetDCVGmol
#   RAMetKid
# Temporary variables assigned:
# Notes:#(v2.0)
#*****
#*****
# Amount of DCVC in body (mg) #(v2.0)
#   dt(ADCVC) = RAMetDCVGmol * MWDCVC
#   + RAMetKid * FracKidDCVC * StochDCVCTCE
#   - kElimDCVC * ADCVC; #(v2.0)

```

```

# Concentration of DCVG in blood (in mmoles/l)#(v2.0)
  CDCVCmol = ADCVC / MWDCVC / VDCVC;#(v2.0)
#*****
*****
#***
          Total Mass Balance
***
#*****
*****
# State Variables with dynamics:
#   InhDose
#   AO
#   AExc
#   AMetLng
#   AMetLiv1
#   AMetLiv2
#   AMetKid
#   AExh
#   ARecircTCOG
#   AOTCOH
#   AMetTCOHTCA
#   AMetTCOHGluc
#   AMetTCOHOther
#   AOTCA
#   AMetTCA
#   ADCVGIn
#   AMetDCVG
#   ADCVCIn
# Input Variables:
#   IVDose
#   IVDoseTCA
#   IVDoseTCOH
# Other State Variables and Global Parameters:
#   BW
#   AStom
#   ADuod
#   ARap
#   ASlw
#   AFat
#   AGut
#   ALiv
#   ATB
#   AKid
#   ABld
#   FracOther
#   FracTCA
#   StochTCOHTCE
#   StochTCOHGluc
#   ABodTCOH
#   ALivTCOH
#   StochTCATCE
#   StochTCATCOH
#   APlasTCA
#   ABodTCA
#   ALivTCA

```

```

# AUrnTCA
# StochGlucTCOH
# ABodTCOG
# ALivTCOG
# ABileTCOG
# AUrnTCOG
# FracKidDCVC
# MWTCE
# ADCVGmol
# MWDCVC
# StochDCVCTCE
# kKidBioact
# ADCVC
# Temporary variables used:
# QP
# QM
# CInh
# CMixExh
# RAO
# RInhDose
# kPOTCA
# kPOTCOH
# RAMetLng
# RAMetLiv1
# RAMetLiv2
# RAMetKid
# CAlv
# RAREcircTCOG
# RAMetTCOHTCA
# RAMetTCOHGluc
# RAMetTCOH
# RAMetTCA
# RAMetDCVGmol
# Temporary variables assigned:
# RInhDose
# TotDose
# TotTissue
# ATotMetLiv
# TotMetab
# RAExc - rate of fecal excretion
# RAExh
# TCEDiff
# MassBaltCE
# TotTCOHIn
# TotTissueTCOH
# TotMetabTCOH
# MassBaltTCOH
# TotTCAIn
# TotTissueTCA
# TCADiff
# MassBaltTCA
# TotTCOGIn
# TotTissueTCOG
# MassBaltTCOG

```

```

#      MassBalDCVG
#      MassBalDCVC
# Notes:
#*****
#**** Mass Balance for TCE
#*****
# Total intake from inhalation (mg)
#(v1.2)      Rinhdose = QP * Cinh;
            Rinhdose = QM * Cinh;
            dt(Inhdose) = Rinhdose;
# Amount of TCE absorbed (mg)
#(v1e)      dt(AO) = RAO;
# Total dose
#(v1e)      TotDose = InhDose + AO + IVDose * BW;
# Total in tissues
#(v1e)      TotTissue = # Astom + ADuod +
#(v1e)      ARap + ASlw + AFat + AGut + ALiv + ATB + AKid + ABld;
            ##      ARap + ASlw + AFat + AGut + ALiv + ATB + AKid; #(v1a)
            ##      ARap + ASlw + AFat + AGut + ALiv + AKid + ABld; #(v1b)
            ##      ARap + ASlw + AFat + AGut + ALiv + AKid; #(v1c)
# Total metabolized
            dt(AMetLng) = RAMetLng; #(vrisk)
            dt(AMetLiv1) = RAMetLiv1; #(vrisk)
            dt(AMetLiv2) = RAMetLiv2; #(vrisk)
            dt(AMetKid) = RAMetKid; #(vrisk)
#(v1e)      ATotMetLiv = AMetLiv1 + AMetLiv2;
#(v1e)      TotMetab = AMetLng + ATotMetLiv + AMetKid;
# Amount of TCE excreted in feces (mg)
#(v1e)      RAExc = kTD * ADuod;
#(v1e)      dt(AExc) = RAExc;
# Amount exhaled (mg)
#(v1.2)      RAExh = QP * CAlv;
            RAExh = QM * CMixExh;
            dt(AExh) = RAExh;
# Mass balance
#(v1e)      TCEDiff = TotDose - TotTissue - TotMetab;
#(v1e)      MassBalTCE = TCEDiff - AExc - AExh;

#(v2.0)
#**** Mass Balance for DCA
#*****
#(v1e)      TotDCAIn = FracOther * StochDCATCE * (AMetLiv1 +
FracLungSys*AMetLng); #(v2.0)
# Amount of DCA eliminated (mg) #(v2.0)
#(v1e)      dt(AElimDCA) = kClearDCA * ADCA; #(v2.0)
#(v1e)      MassBalDCA = TotDCAIn - ADCA - ADCAPER - AElimDCA; #(v2.0)
TotDCAProd = (FracOther * StochDCATCE * #(vrisk)
            (AMetLiv1 + FracLungSys*AMetLng)); #(vrisk)

#**** Mass Balance for TCOH
#*****
# Total production/intake of TCOH
#(v1e)      dt(ARecircTCOG) = RARecircTCOG;

```

```

#(vle)      dt(AOTCOH) = kPOTCOH;
#(vle)      TotTCOHIn = AOTCOH + IVDoseTCOH * BW
#(vle)      + ((1.0 - FracOther - FracTCA) * StochTCOHTCE *
#(vle)      (AMetLiv1 + FracLungSys*AMetLng))
#(vle)      + (StochTCOHGluc * ARecircTCOG);
# Total in tissues
#(vle)      TotTissueTCOH = ABodTCOH + ALivTCOH;
# Total metabolism of TCOH
      dt(AMetTCOHTCA) = RAMetTCOHTCA; #(vrisk)
#(vle)      dt(AMetTCOHGluc) = RAMetTCOHGluc;
#(vle)      dt(AMetTCOHOther) = RAMetTCOH;
#(vle)      TotMetabTCOH = AMetTCOHTCA + AMetTCOHGluc + AMetTCOHOther;
# Mass balance
#(vle)      MassBalTCOH = TotTCOHIn - TotTissueTCOH - TotMetabTCOH;

#**** Mass Balance for TCA
*****
# Total production/intake of TCA
#(vle)      dt(AOTCA) = kPOTCA;
#(vle)      TotTCAIn = AOTCA + IVDoseTCA * BW
TotTCAProd = (FracTCA*StochTCATCE*(AMetLiv1 + FracLungSys*AMetLng)) +
#(vrisk)
      (StochTCATCOH*AMetTCOHTCA); #(vrisk)#(vrisk)
# Total in tissues
#(vle)      TotTissueTCA = APlasTCA + ABodTCA + ALivTCA;
      ## TotTissueTCA = ABodTCA + ALivTCA; #(vlh)
# Total metabolism of TCA
#(vle)      dt(AMetTCA) = RAMetTCA;
# Mass balance
#(vle)      TCADiff = TotTCAIn - TotTissueTCA - AMetTCA;
#(vle)      MassBalTCA = TCADiff - AUrnTCA;

#**** Mass Balance for TCOG
*****
# Total production of TCOG
#(vle)      TotTCOGIn = StochGlucTCOH * AMetTCOHGluc;
# Total in tissues
#(vle)      TotTissueTCOG = ABodTCOG + ALivTCOG + ABileTCOG;
# Mass balance
#(vle)      MassBalTCOG = TotTCOGIn - TotTissueTCOG - ARecircTCOG -
AUrnTCOG;

#**** Mass Balance for DCVG
*****
# Total production of DCVG
#(vle)      dt(ADCVGIn) = (RAMetLiv2 + RAMetKid*(1-FracKidDCVC)) / MWTCE;
# Metabolism of DCVG
#(vle)      dt(AMetDCVG) = RAMetDCVGmol;
# Mass balance
#(vle)      MassBalDCVG = ADCVGIn - ADCVGmol - AMetDCVG;

#**** Mass Balance for DCVC
*****
# Total production of DCVC

```

```

#(v1e)      dt(ADCVCIn) = RAMetDCVGmol * MWDCVC
#(v1e)      + RAMetKid * FracKidDCVC * StochDCVCTCE;
# Rate of DCVC eliminated (mg)#(v2.0)
#(v1e)      RAElimDCVC = kElimDCVC * ADCVC;#(v2.0)
# Dynamics for amount of DCVC eliminated (mg)#(v2.0)
#(v1e)      dt(AElimDCVC) = RAElimDCVC;#(v2.0)
# Mass balance#(v2.0)
#(v1e)      MassBalDCVC = ADCVCIn - ADCVC - AElimDCVC;#(v2.0)

*****
*****
#***                      Dynamic Outputs
***
*****
*****
# State Variables with dynamics:
# Input Variables:
#   none
# Other State Variables and Global Parameters:
# Temporary variables used:
# Temporary variables assigned:
# Notes:
#   INCOMPLETE
*****
*****
# Amount exhaled during exposure (mg)
      dt(AExhExp) = (CInh > 0 ? RAExh : 0);

*****
*****
#***                      Dose Metrics
***
*****
*****
# State Variables with dynamics:
# Input Variables:
# Other State Variables and Global Parameters:
# Temporary variables used:
# Temporary variables assigned:
# Notes:
#   INCOMPLETE
*****
*****
#*** AUCs in mg-hr/L
*****
#AUC of TCE in arterial blood
#(v1d)      dt(AUCCBld) = CArt;
#AUC of TCE in liver
#(v1d)      dt(AUCCLiv) = CLiv;
#AUC of TCE in kidney
#(v1d)      dt(AUCCKid) = CKid;
#AUC of TCE in fat
#(v1d)      dt(AUCCFat) = CFat;
#AUC of TCE in rapidly perfused

```

```

#(vld)      dt(AUCCRap) = CRap;
#AUC of TCE in slowly perfused
#(vld)      dt(AUCCSlw) = CSlw;
#AUC of TCE in gut
#(vld)      dt(AUCCGut) = CGut;
#AUC of Chl in lung
#(vld)      ChlFac = (StochChlorTCE / VMaxClear) * RAMetLng;
              # Steady-state concentration of Chloral (mg/L)
#(vld)      CChl = (KMClear * ChlFac) / (1.0 - ChlFac);
#(vld)      dt(AUCCChl) = CChl;
#AUC of TCOH in blood
#(vld)      dt(AUCCTCOH) = CTCOH;
#AUC of free TCA in the plasma (mg/L * hr)
#(vld)      dt(AUCPlasTCAFree) = CPlasTCAFree;
#AUC of total TCA in plasma (mg/L * hr)
#(vld)      dt(AUCPlasTCA) = CPlasTCA;
#AUC of TCOG in blood
#(vld)      dt(AUCCTCOG) = CTCOG;

*****
*****
#**** Misc - Alternative models
*****
*****
#
## Alternative sampling scheme
## Priors on ViC are TruncNormal(0,1,-3,3)
#   MFat = BW * (Male == 0 ? 0.31667 : 0.19863) *
#         (1 + (Male == 0 ? 0.206 : 0.256) * VFatC);
#   LBM = BW * (1 - Mfat);
#   MLiv = LBM * (Male == 0 ? 0.03414 : 0.03078) *
#         (1 + (Male == 0 ? 0.102 : 0.093) * VLivC);
#   MTB = BW * 0.00018 *
#         (1 + 0.1 * VTBC);
#   MGut = (Male == 0 ? 0.02192 : 0.01959) *
#         (1 + (Male == 0 ? 0.092 : 0.078) * VGutC);
#   MRap = (Male == 0 ? 0.09925 : 0.10581) *
#         (1 + (Male == 0 ? 0.186 : 0.106) * VRapC);
#   MNp = LBM * (Male == 0 ? 0.26103 : 0.23241);
#   MSlw = BW - MFat - MLiv - MTB - MGut - MRap - MNp;
## Convert to volume using density
#   VFat = MFat / 0.923;
#   VGut = MGut / 1.05;
#   VLiv = MLiv / 1.05;
#   VRap = MRap / 1.05;
#   VTB = MTB / 1.05;
#   VSlw = MSlw / 1.05;
#
#   VBld = (Male == 0 ? 0.688 : 0.725) * VRap; # Fraction of Rap
#   VPlas = FracPlas * VBld;
#   VBod = VFat + VGut + VRap + VTB + VSlw - VBld;
#         # for TCA -- body without liver or blood
#   VBodTCOH = VFat + VGut + VRap + VTB + VSlw;

```

```

#           # for TCOH and TCOG -- body without liver
#
## Revised Sampling of Flows
## Priors on QiC are TruncNormal(0,1,-3,3)
#   QFatCtmp = MFat / BW * (Male == 0 ? 0.268 : 0.252) *
#             (1 + 0.3 * QFatC);
#   QTBCtmp = MTB / BW * 140 *
#           (1 + 0.3 * QTBC);
#   QGutCtmp = MGut / BW * (Male == 0 ? 9.58 : 9.70) *
#           (1 + 0.3 * QLivC);
#   QLivCtmp = MLiv / BW * (Male == 0 ? 2.826 : 2.6) *
#           (1 + 0.3 * QLivC);
#   QRapCtmp = MRap / BW * (Male == 0 ? 3.81 : 3.67) *
#           (1 + 0.3 * QRapC);
#   QSlwCtmp = MSlw / BW * (Male == 0 ? 0.658 : 0.607) *
#           (1 + 0.3 * QLivC);
#   QtotCtmp = QFatCtmp + QTBCtmp + QGutCtmp + QLivCtmp +
#             QRapCtmp + QSlwCtmp;
#
## Alternative sampling scheme
#
#   QFat = QCnow * QFatCtmp / QtotCtmp;
#   QGut = QCnow * QGutCtmp / QtotCtmp;
#   QLiv = QCnow * QLivCtmp / QtotCtmp;
#   QSlw = QCnow * QSlwCtmp / QtotCtmp;
#   QTBC = QCnow * QTBCtmp / QtotCtmp;
#   QRap = QCnow * QRapCtmp / QtotCtmp;
#   QGutLiv = QGut + QLiv;
#
*****
***           TCA Sub-model -- different protein binding
***
*****
# ## NOT YET TESTED
# In the original model, CBnd is constant while perfusing through tissue,
#   while CFree changes in response to CTissue.
# In this model, CBnd and CFree are in constant equilibrium while
perfusing,
#   so both CBnd and CFree change in response to CTissue.
# In both cases, tissue only exchanges with CFree, via partition
coefficient.
#
#   CVBodTCA = (BMax+kDissoc + CVBodTCAFree)*CVBodTCAFree /
#             (kDissoc + CVBodTCAFree);   # total in equilibrium
#   dt(ABodTCA) = QBodPlas * (CPlasTCA - CVBodTCA);
#   CVLivTCA = (BMax+kDissoc + CVLivTCAFree)*CVLivTCAFree /
#             (kDissoc + CVLivTCAFree);
#   dt(ALivTCA) = kPOTCA + QGutLivPlas*(CPlasTCA - CVLivTCA)
#             - RAMetTCA + (FracTCA * StochTCATCE * RAMetLiv1)
#             + (StochTCATCOH * RAMetTCOHTCA);
*****
*****

```

```

****                               TCE sub-model -- alternatives
***
*****
*****
***** Alternative local steady-state gas exchange assumption
*****
# ## TESTED - Makes very little difference, but does not add noticeably
#   to computation burden
# VRaptmp and PRaptmp are the "original" parameters
# VRap = VRaptmp + VBld; #(v1a) -- now add blood to rapidly perfused
# Change VSlw so as to not double-count blood
# VBod = VFat + VGut + VRaptmp + VTB + VKid + VSlw; # For TCA #(v1a) --
doesn't include blood
# PRap = (PRaptmp*VRaptmp + VBld)/(VRaptmp + VBld); # Adjust PC
# Remove ABld from mass balance
#
#   CVen = (QFat*CVFat + QGutLiv*CVLiv + QSlw*CVSlw +
#           QRap*CVRap + QTB*CVTB + QKid*CVKid + kIV) / QCnow;
#
**** Alternative local steady state TB region
*****
# ## TESTED - Makes very little difference, but does not add noticeably
#   to computation burden
# VRaptmp and PRaptmp are the "original" parameters
# VRap = VRaptmp + VTB; # add TB volume to rapidly perfused volume
# Change VSlw so as to not double-count blood
# VBod = VFat + VGut + VRaptmp + VTB + VKid + VSlw; # For TCA #(v1b)
don't double-count TB
# (v1b) temporary variable for Rapidly perfused blood flow
# QRapCtmp = 1 - QFatCtmp - QGutCtmp - QLivCtmp - QSlwCtmp - QTBCtmp -
QKidCtmp;
# PRap = (QRapCtmp+QTBCtmp)/(QRapCtmp/PRaptmp + QTBCtmp/PTB); #(v1b) --
now adjust PC for TB
#   QRap = QCnow - QFat - QGut - QLiv - QSlw - QKid; # (v1b) don't
subtract off TB
# Remove ATB from mass balance
# Remove CVTB from Blood mass balance
# Remove old definitions of CTB, CVTB
# Include RAMetLng metabolism in ARap differential equation
# Use local steady state approximation
#
# Venous blood draining TB
#   a = (VMaxClara/QTB + KMClara - CArt)/2;
#   b = CArt*KMClara;
#   CVTB = (b < 0.01*a*a ? b/2.0/a : sqrt(a*a+b)-a);
# Amount of TCE in the tracheo-bronchial region (mg)
#   CTB = CVTB * PTB;
#   ATB = CTB * VTB;
# Amount metabolized in the tracheo-bronchial region (mg)
#   a = (VMaxClara + QTB*(KMClara + CArt))/2;
#   b = CArt*QTB*VMaxClara;
#   RAMetLng = (b < 0.01*a*a ? b/2.0/a : a-sqrt(a*a-b));
#

```

```

#**** Alternative local steady state kidney
*****
# ## Probably not a good idea because kidney is target issue
#
# Similar procedure to TB
#
# Use local steady state approximation
#
# Venous blood draining Kid
#   a = (VMaxKidDCVG/QKid + KMKidDCVG - CArt)/2;
#   b = CArt*KMKidDCVG;
#   CVKid = (b < 0.01*a*a ? b/2.0/a : sqrt(a*a+b)-a);
# Amount of TCE in the kidney compartment (mg)
#   CKid = CVKid * PKid;
#   AKid = CKid * VKid;
# Amount metabolized in the kidney compartment (mg)
#   a = (VMaxKidDCVG + QKid*(KMKidDCVG + CArt));
#   b = CArt*QKid*VMaxKidDCVG;
#   RAMetKid = (b < 0.01*a*a ? b/2.0/a : a-sqrt(a*a-b));
#
#*****
#*****
# OLD MODEL FOR ORAL DOSING -- no longer used
#ASTom = Total - Abs; # OLD
#dt(Abs) = (kAS * ASTom) + (kTSD * ASTom); # OLD
#**** Alternative model with diffusion-limited fat -- not used
#*****
#   #AFatBld, # Amount in fat blood -- for diffusion-limited fat
# Amount of TCE in fat blood (mg)
#   dt(AFatBld) = (QFat * (CArt - AFatBld/VFatBld)) +
#   (PAFat2 * (CFat/PFat)) - (PAFat1 * AFatBld/VFatBld);
#   dt(AFat) = (PAFat1 * CVFat) - (PAFat2 * (CFat / PFat));
# Total amount in fat blood and fat tissue (mg)
#   ATotFat = AFatBld + AFat;

};
##### End of Dynamics #####

CalcOutputs{

#**** Static outputs for comparison to data
*****
# TCE
#(v1.2)   AlvRet = (InhDose > 0 ? 1 - AExhExp/InhDose : 1); #
          RetDose = ((InhDose-AExhExp) > 0 ? (InhDose - AExhExp) : 1e-15); #
          CALvPPM = (CALv < 1.0e-15 ? 1.0e-15 : CALv * (24450.0 / MWTCE));
          CInhPPM = (ACh < 1.0e-15 ? 1.0e-15 : ACh/VCh*24450.0/MWTCE);
          # CInhPPM Only used for CC inhalation
#(v1.2)   CMixExh = (0.7 * CALv) + (0.3 * CInh);
          CArt = (CArt < 1.0e-15 ? 1.0e-15 : CArt);

```

```

CVen = (CVen < 1.0e-15 ? 1.0e-15 : CVen);
CBldMix = (CArt+CVen)/2;
CFat = (CFat < 1.0e-15 ? 1.0e-15 : CFat);
CGut = (CGut < 1.0e-15 ? 1.0e-15 : CGut);
CRap = (CRap < 1.0e-15 ? 1.0e-15 : CRap);
CSlw = (CSlw < 1.0e-15 ? 1.0e-15 : CSlw);
#(v1.2) CTB = (CTB < 1.0e-15 ? 1.0e-15 : CTB);
CHrt = CRap;
CKid = (CKid < 1.0e-15 ? 1.0e-15 : CKid);
CLiv = (CLiv < 1.0e-15 ? 1.0e-15 : CLiv);
CLung = CRap; #(v1.2)
CMus = (CSlw < 1.0e-15 ? 1.0e-15 : CSlw);
CSpl = CRap;
CBrn = CRap;
zAExh = (AExh < 1.0e-15 ? 1.0e-15 : AExh);
zAExhpost = ((AExh - AExhExp) < 1.0e-15 ? 1.0e-15 : AExh -
AExhExp);
# TCOH
CTCOH = (CTCOH < 1.0e-15 ? 1.0e-15 : CTCOH);
CBodTCOH = (ABodTCOH < 1.0e-15 ? 1.0e-15 : ABodTCOH/VBodTCOH);
CKidTCOH = CBodTCOH;
CLivTCOH = (ALivTCOH < 1.0e-15 ? 1.0e-15 : ALivTCOH/VLiv);
CLungTCOH = CBodTCOH;
# TCA
CPlasTCA = (CPlasTCA < 1.0e-15 ? 1.0e-15 : CPlasTCA);
CBldTCA = CPlasTCA*TCAPlas;
CBodTCA = (CBodTCA < 1.0e-15 ? 1.0e-15 : CBodTCA);
CLivTCA = (CLivTCA < 1.0e-15 ? 1.0e-15 : CLivTCA);
CKidTCA = CBodTCA;
CLungTCA = CBodTCA;
zAUrnTCA = (AUrnTCA < 1.0e-15 ? 1.0e-15 : AUrnTCA);
zAUrnTCA_sat = (AUrnTCA_sat < 1.0e-15 ? 1.0e-15 : AUrnTCA_sat);
zAUrnTCA_collect = (AUrnTCA_collect < 1.0e-15 ? 1.0e-15 :
AUrnTCA_collect);
# TCOG
zABileTCOG = (ABileTCOG < 1.0e-15 ? 1.0e-15 : ABileTCOG);
# Concentrations are in TCOH-equivalents
CTCOG = (CTCOG < 1.0e-15 ? 1.0e-15 : CTCOG);
CTCOGTCOH = StochTCOHGluc*CTCOG;
CBodTCOGTCOH = (ABodTCOG < 1.0e-15 ? 1.0e-15 :
StochTCOHGluc*ABodTCOG/VBodTCOH);
CKidTCOGTCOH = CBodTCOGTCOH;
CLivTCOGTCOH = (ALivTCOG < 1.0e-15 ? 1.0e-15 :
StochTCOHGluc*ALivTCOG/VLiv);
CLungTCOGTCOH = CBodTCOGTCOH;
AUrnTCOGTCOH = (AUrnTCOG < 1.0e-15 ? 1.0e-15 :
StochTCOHGluc*AUrnTCOG);
AUrnTCOGTCOH_sat = (AUrnTCOG_sat < 1.0e-15 ? 1.0e-15 :
StochTCOHGluc*AUrnTCOG_sat);
AUrnTCOGTCOH_collect = (AUrnTCOG_collect < 1.0e-15 ? 1.0e-15 :
StochTCOHGluc*AUrnTCOG_collect);
# Other
CDCVGmol = (CDCVGmol < 1.0e-15 ? 1.0e-15 : CDCVGmol);
CDCVGmol0 = CDCVGmol;

```

```

CDCVG_NDtmp = CDFNormal(3*(1-CDCVGmol/CDCVGmolLD));
# Assuming LD = 3*sigma_blank, Normally distributed
CDCVG_ND = ( CDCVG_NDtmp < 1.0 ? ( CDCVG_NDtmp >= 1e-100 ? -
log(CDCVG_NDtmp) : -log(1e-100)) : 1e-100 );
# DCVC#(v2.0)
CDCVCmol = (CDCVCmol < 1.0e-15 ? 1.0e-15 : CDCVCmol);#(v2.0)
CDCVCmol0 = CDCVCmol;#(v2.0)
CDCVC_NDtmp = CDFNormal(3*(1-CDCVCmol/CDCVCmolLD)); # (v2.0)
# Assuming LD = 3*sigma_blank, Normally distributed#(v2.0)
CDCVC_ND = ( CDCVC_NDtmp < 1.0 ? ( CDCVC_NDtmp >= 1e-100 ? -
log(CDCVC_NDtmp) : -log(1e-100)) : 1e-100 );#(v2.0)
# DCA#(v2.0)
CDCAmol = (CDCAmol < 1.0e-15 ? 1.0e-15 : CDCAmol);#(v2.0)
CDCAmol0 = CDCAmol;#(v2.0)
CDCA_NDtmp = CDFNormal(3*(1-CDCAmol/CDCAmolLD)); # (v2.0)
# Assuming LD = 3*sigma_blank, Normally distributed#(v2.0)
CDCA_ND = ( CDCA_NDtmp < 1.0 ? ( CDCA_NDtmp >= 1e-100 ? -
log(CDCA_NDtmp) : -log(1e-100)) : 1e-100 );#(v2.0)
#
AUrnTCTotMole = zAUrnTCA / MWTCA + AUrnTCOGTCOH / MWTCOH;
TotCTCOH = CTCOH + CTCOGTCOH;
TotCTCOHcomp = CTCOH + CTCOG; # ONLY FOR COMPARISON WITH HACK
ATCOG = ABodTCOG + ALivTCOG; # ONLY FOR COMPARISON WITH HACK
# Misc
CVenMole = CVen / MWTCE;
CPlasTCAMole = (CPlasTCAMole < 1.0e-15 ? 1.0e-15 : CPlasTCAMole);
CPlasTCAFreeMole = (CPlasTCAFreeMole < 1.0e-15 ? 1.0e-15 :
CPlasTCAFreeMole);

#**** Dose Metrics
*****
# Oxidation/BW
#(v1d) AMetLiv1BW = AMetLiv1 / BW;

AMetOX = AMetLiv1 + AMetLng;#(vrisk)
AMetGSH = AMetLiv2 + AMetKid;#(vrisk)

};

```
